# Supplementary material for: Synthesis of novel palladium(ii) complexes with oxalic acid diamide derivatives and their interaction with nucleosides and proteins. Structural, solution, and computational study
Source: Royal Society of Chemistry journal article supplement (doi:10.1039/c3dt53384k), 2014-07-30
Supplement: c3dt53384k1.pdf [file c3dt53384k1.pdf]

**Figure S1.** IR spectra of the oxamido-*N*-aminopropyl-*N'*-benzoic acid, H<sub>3</sub>obap (**1**) and *N,N'*-bis(3-aminopropyl) ethanediamide, H<sub>2</sub>(apox) (**2**) ligands

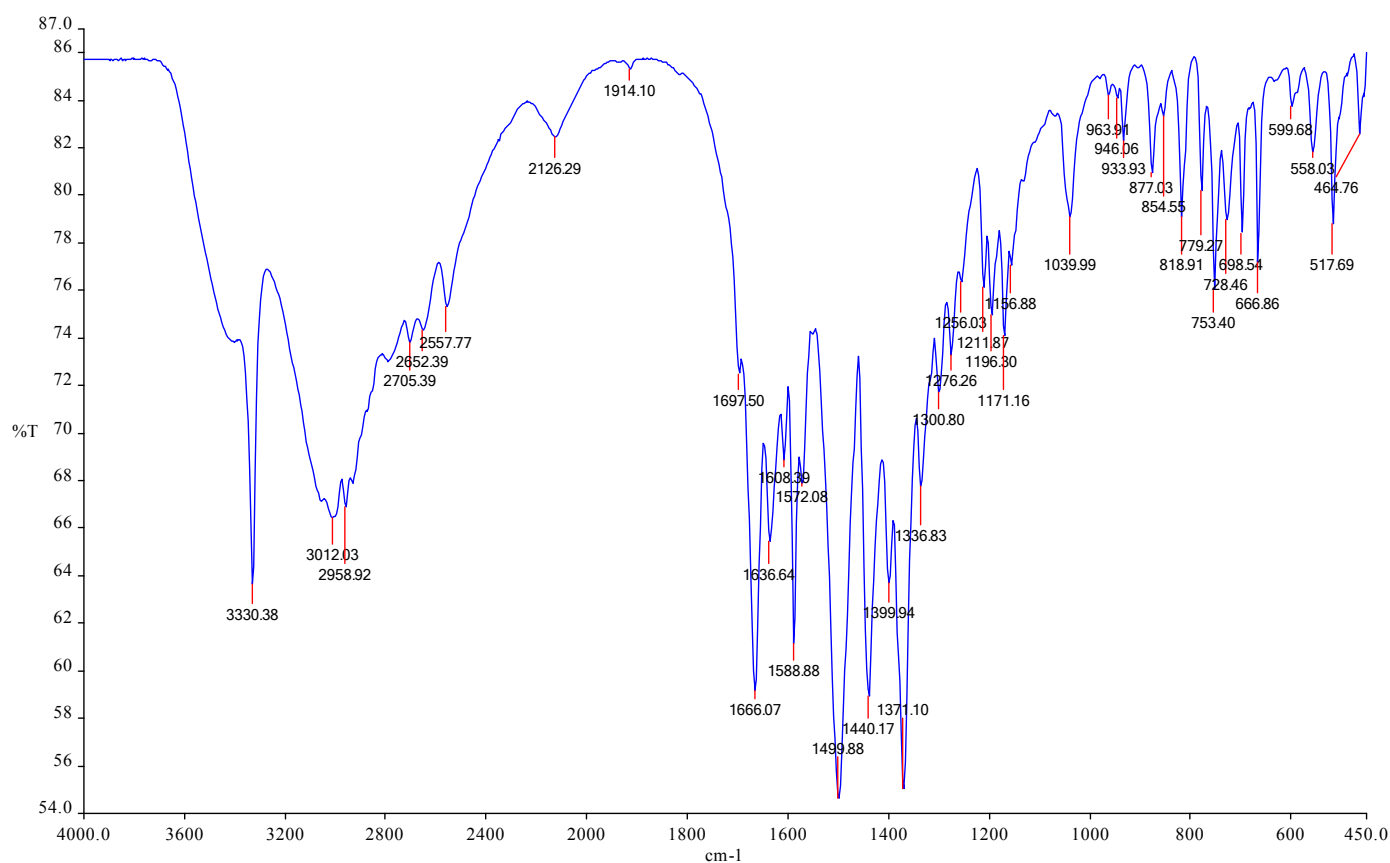

Oxamido-*N*-aminopropyl-*N'*-benzoic acid, H<sub>3</sub>obap (**1**)

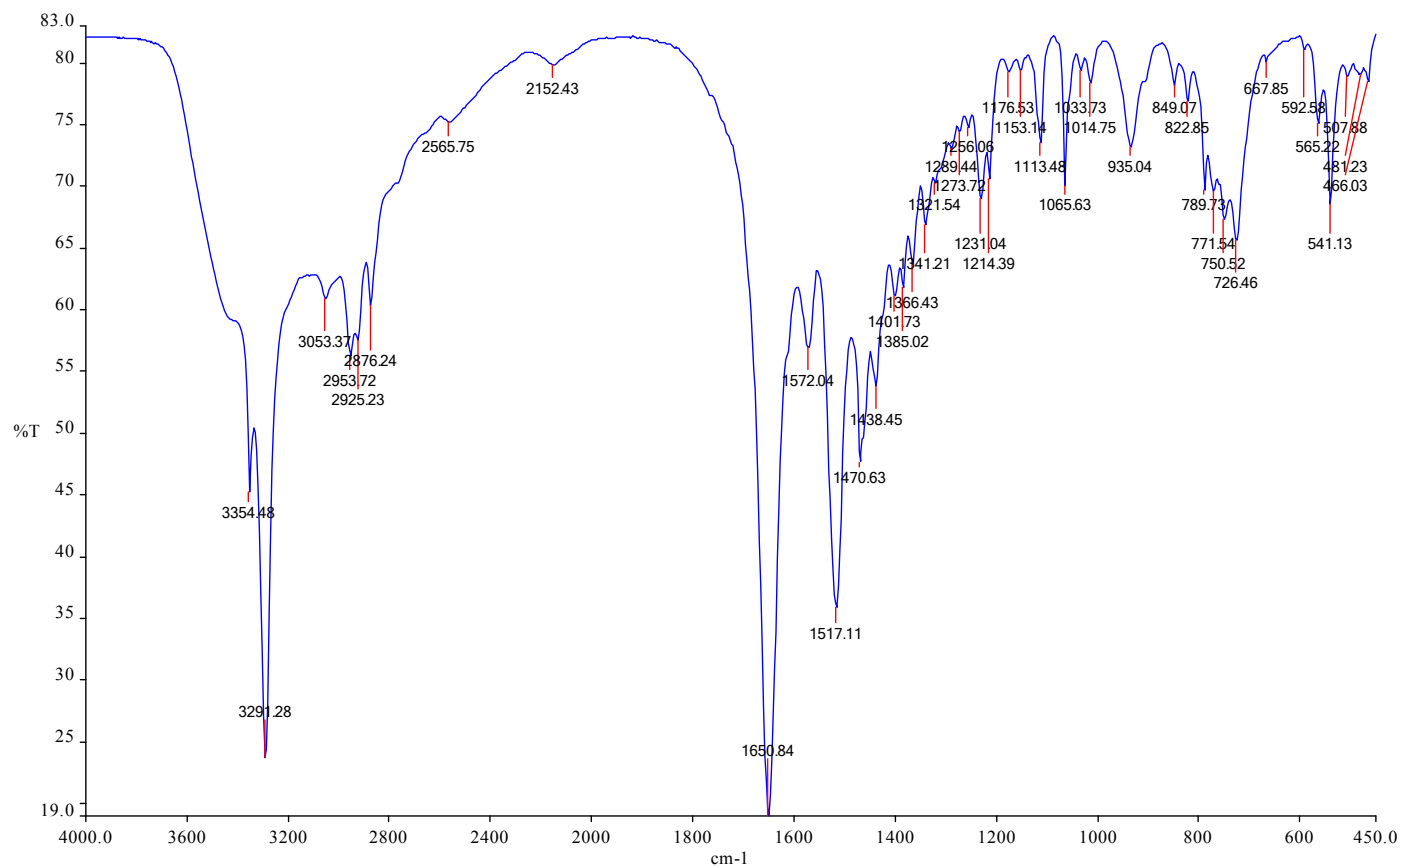

*N,N'*-bis(3-aminopropyl) ethanediamide, H<sub>2</sub>(apox) (2)

**Figure S2.** IR spectra of the Potassium-[(oxamido-*N*-aminopropyl-*N'*-benzoato)palladium(II)] trihydrate,  $\text{KH}[\text{Pd}(\text{obap})]_2 \cdot 3\text{H}_2\text{O}$  (**3**) and *N,N'*-bis(3-aminopropyl)oxamide palladium(II),  $[\text{Pd}(\text{apox})]$  (**4**) complexes

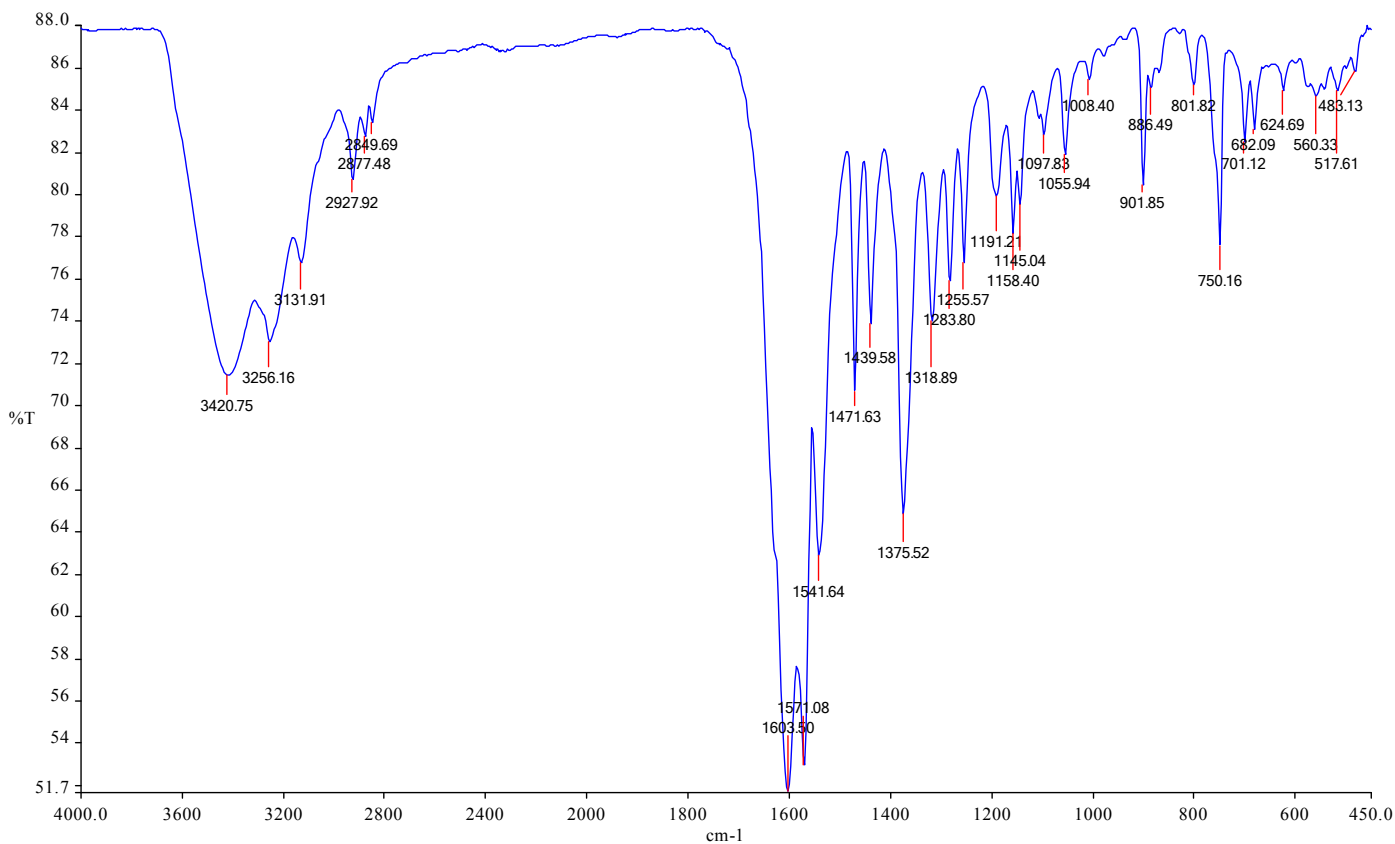

PotassiumHydrogen-[(oxamido-*N*-aminopropyl-*N'*-benzoato)palladium(II)]trihydrate,  $\text{KH}[\text{Pd}(\text{obap})]_2 \cdot 3\text{H}_2\text{O}$  (**3**)

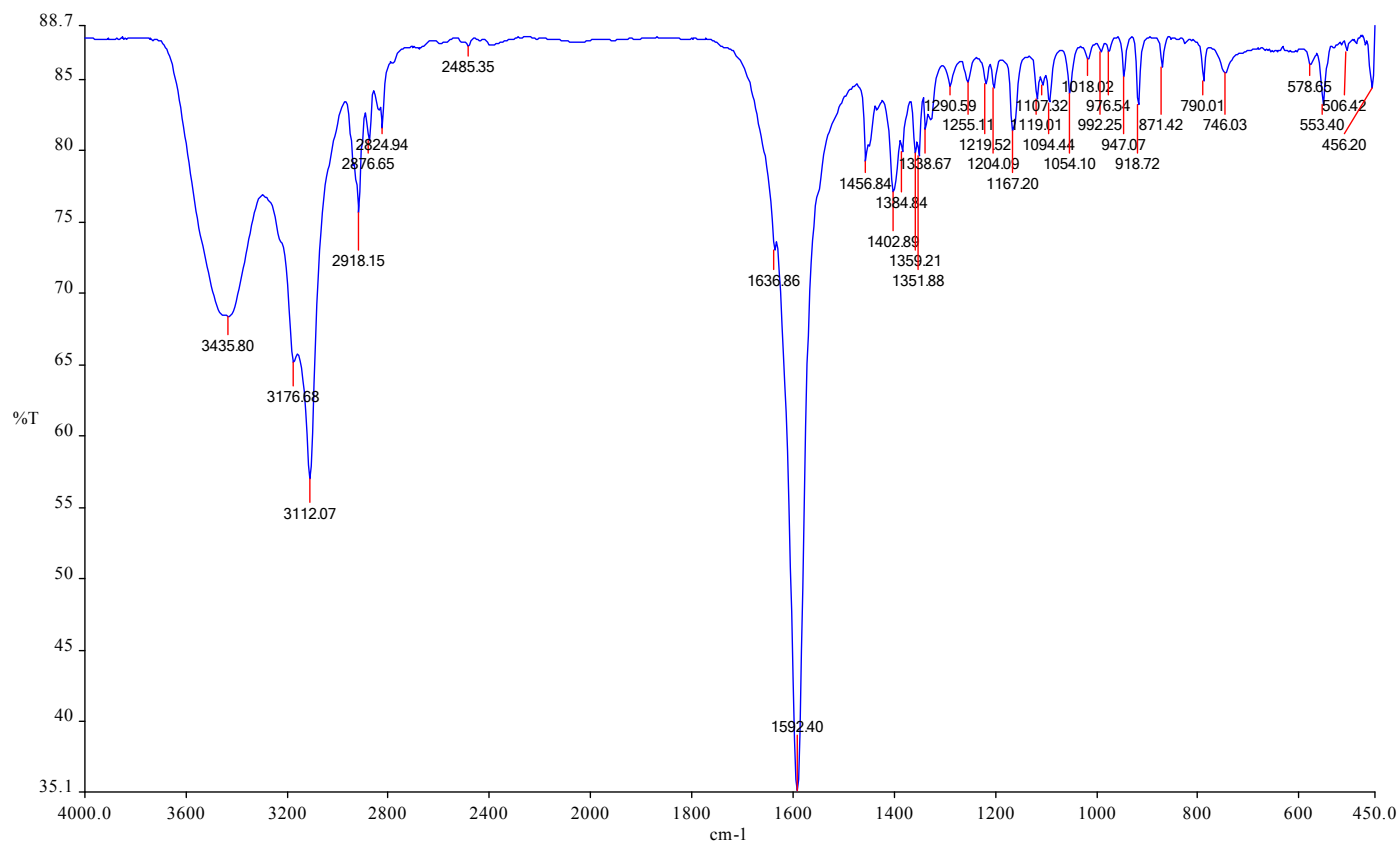

*N,N'*-bis(3-aminopropyl)oxamide palladium(II), [Pd(apox)] (**4**)

**Figure S3.**  $^1\text{H}$  NMR and  $^{13}\text{C}$  NMR spectra of the oxamido-*N*-aminopropyl-*N'*-benzoic acid, H<sub>3</sub>obap (**1**) and *N,N'*-bis(3-aminopropyl) ethanediamide, H<sub>2</sub>(apox) (**2**) ligands

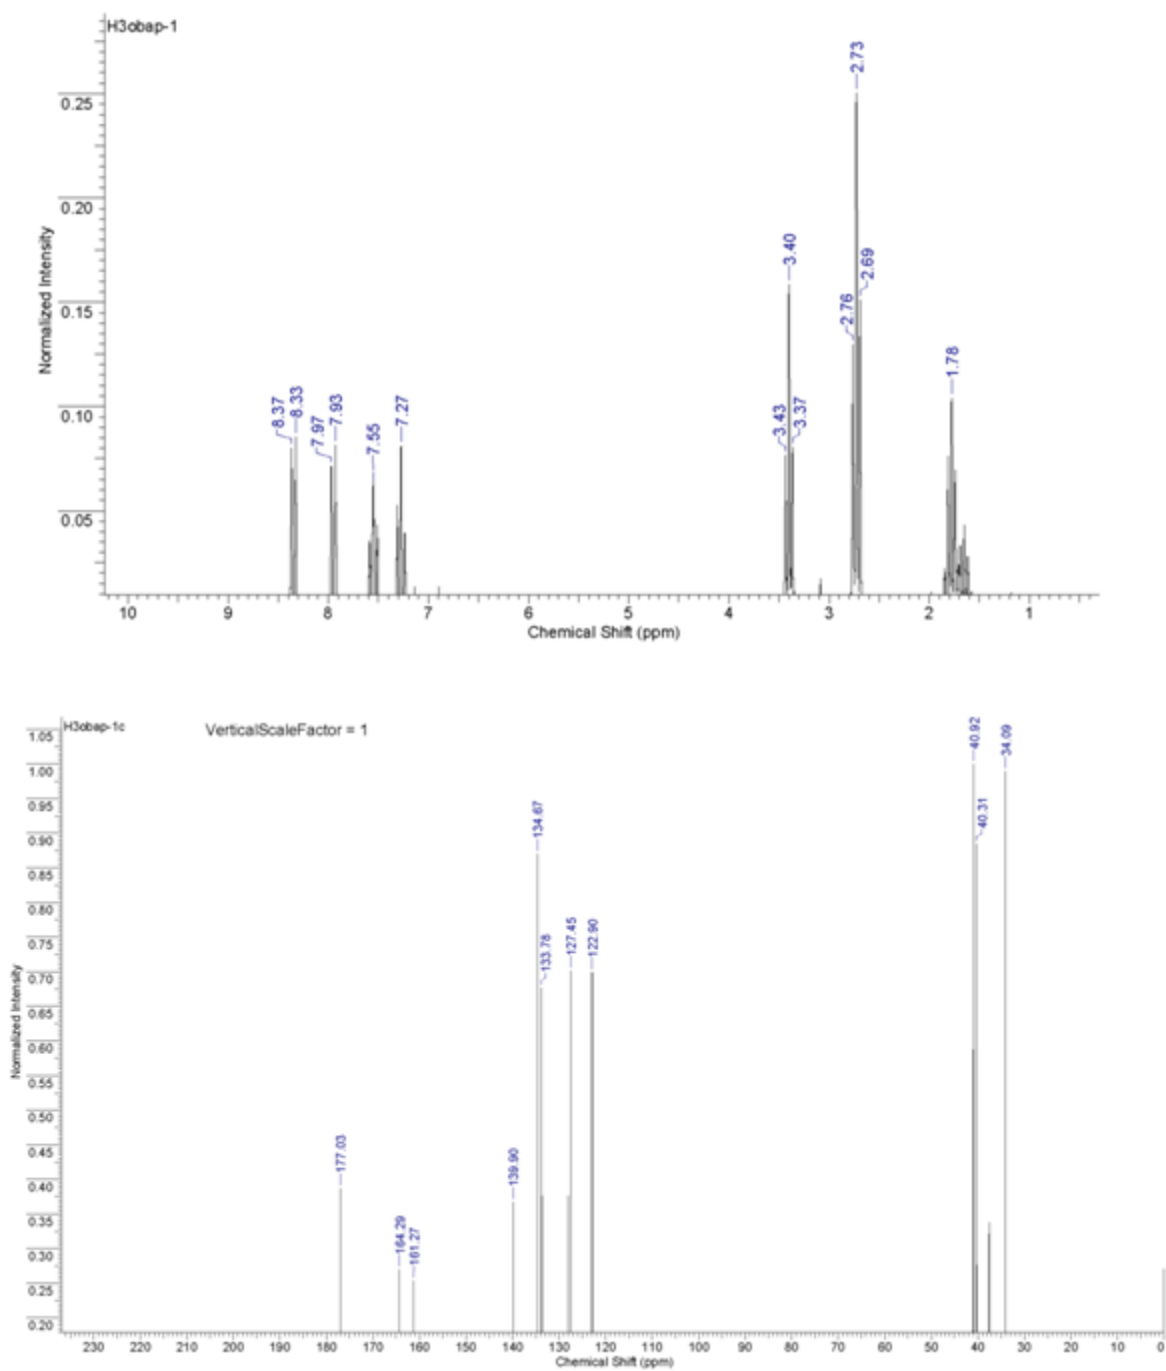

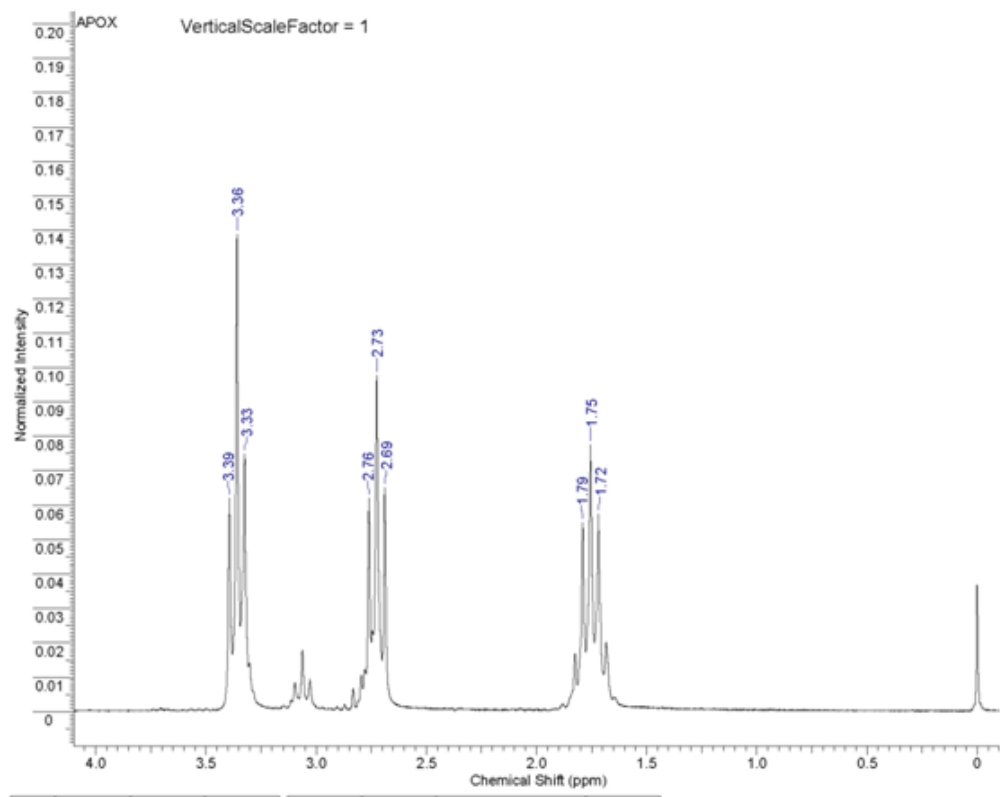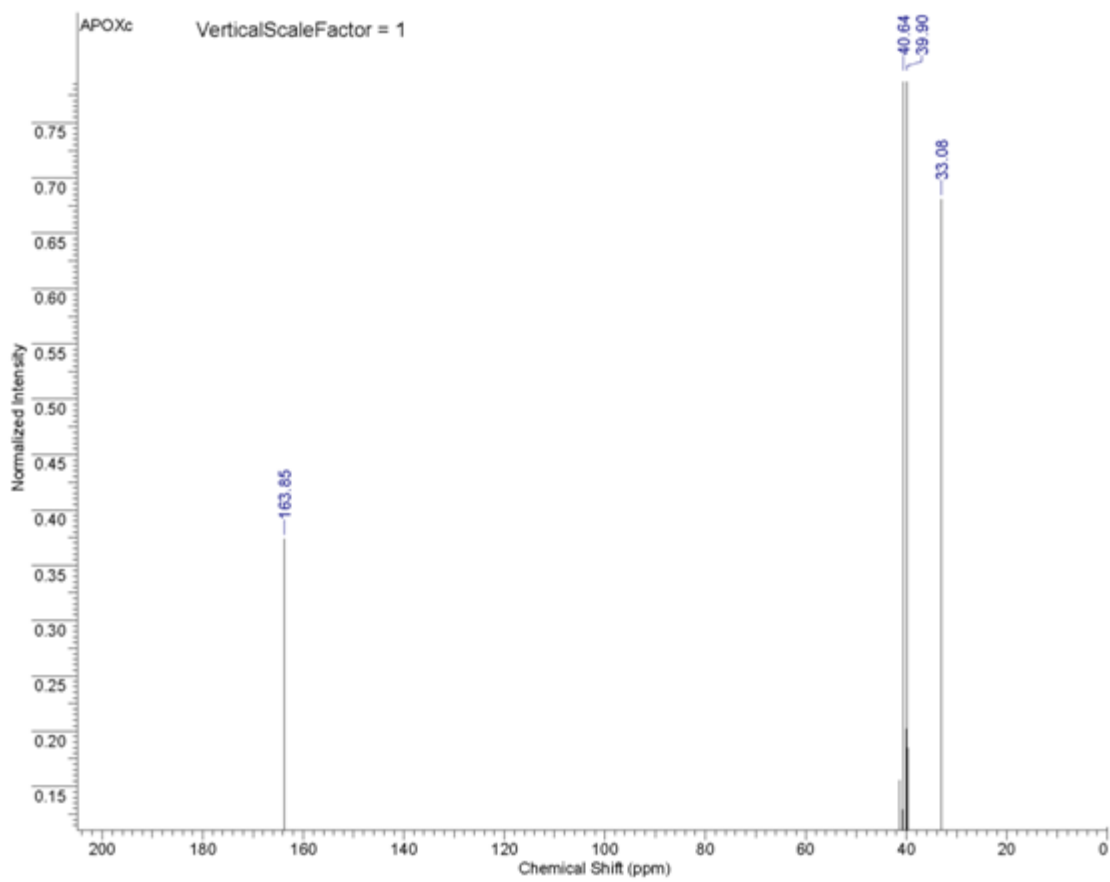

**Figure S4.**  $^1\text{H}$  NMR and  $^{13}\text{C}$  NMR spectra of the Potassium-[(oxamido-*N*-aminopropyl-*N'*-benzoato)palladium(II)] trihydrate,  $\text{KH}[\text{Pd}(\text{obap})]_2 \cdot 3\text{H}_2\text{O}$  (**3**) and *N,N'*-bis(3-aminopropyl)oxamide palladium(II),  $[\text{Pd}(\text{apox})]$  (**4**) complexes

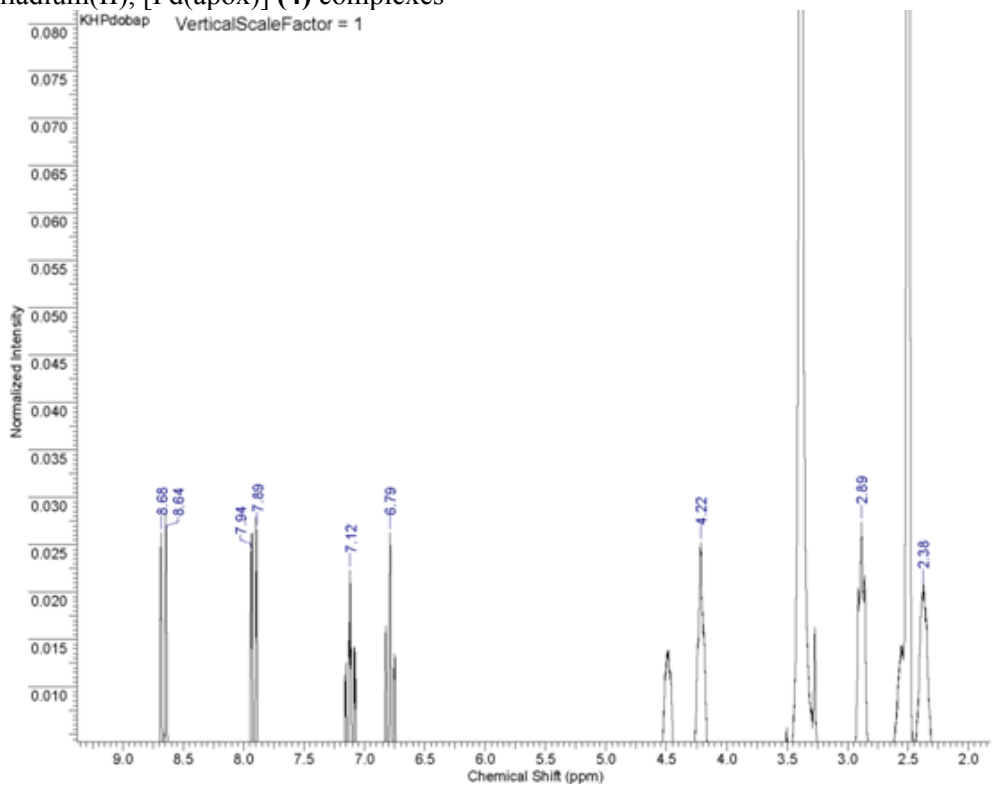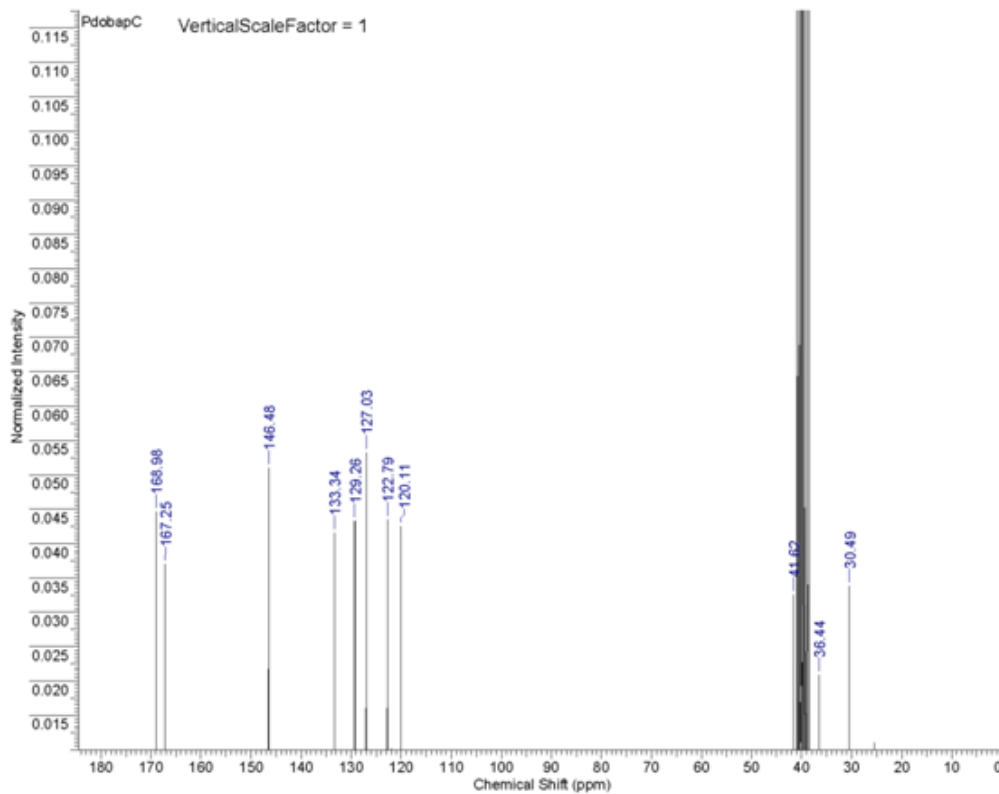

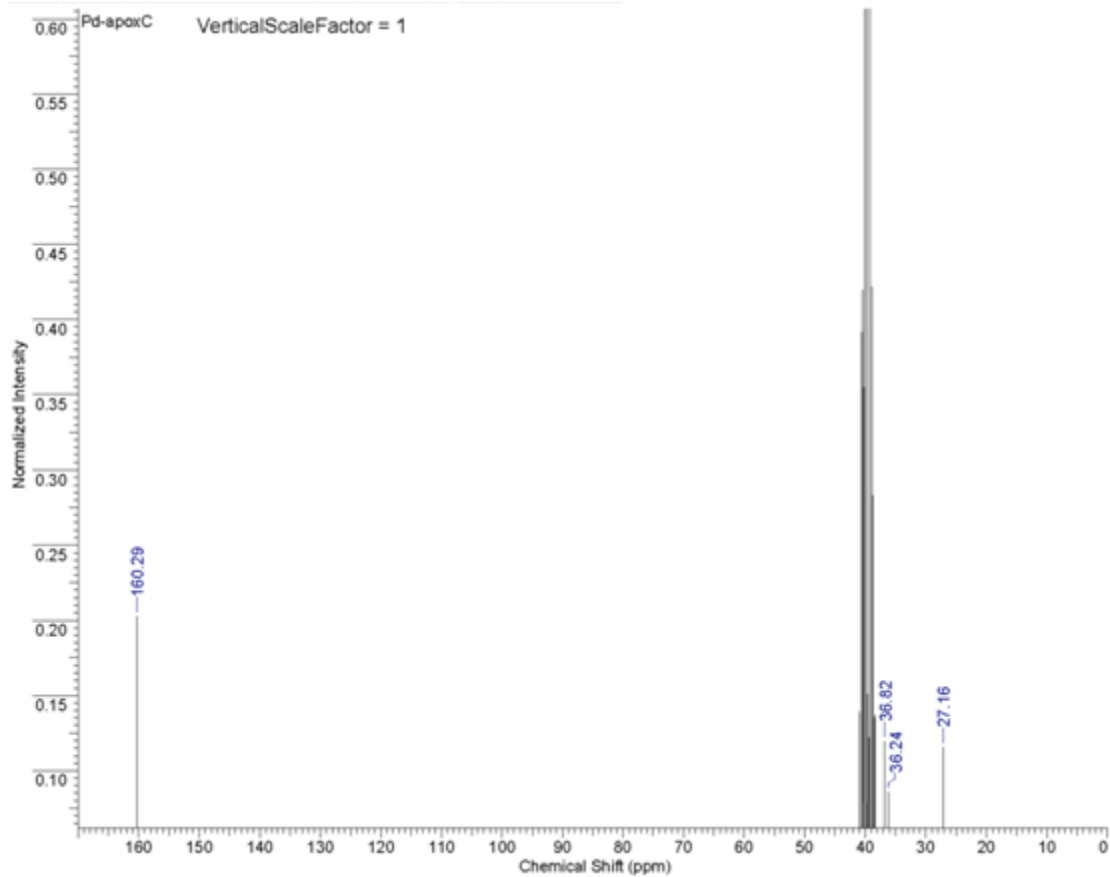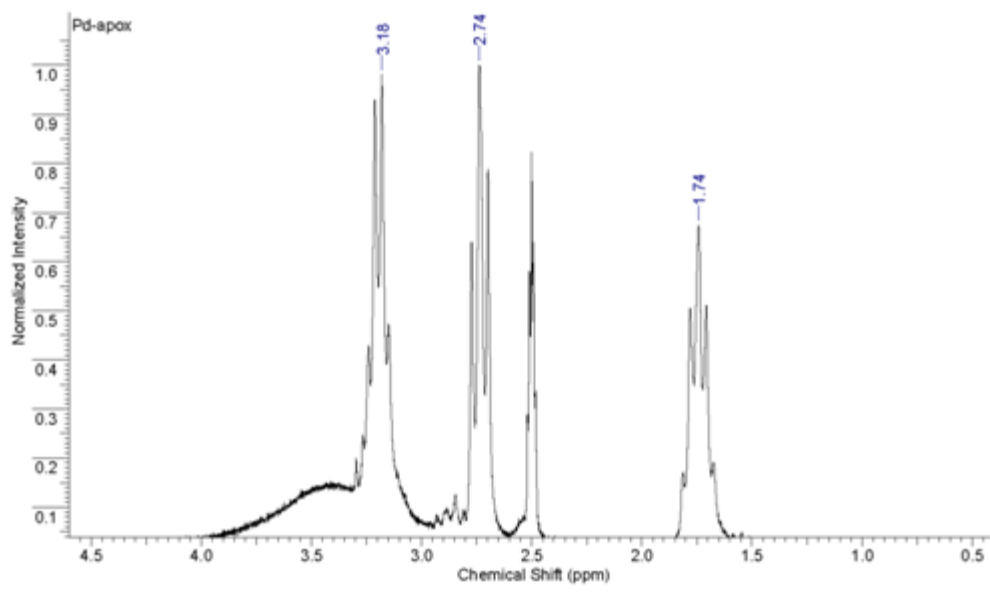



**Figure S5.** UV spectra of the PotassiumHydrogen-[(oxamido-*N*-aminopropyl-*N'*-benzoato)palladium(II)] trihydrate,  $\text{KH}[\text{Pd}(\text{obap})]_2 \cdot 3\text{H}_2\text{O}$  (**3**) and *N,N'*-bis(3-aminopropyl)oxamide palladium(II),  $[\text{Pd}(\text{apox})]$  (**4**) complexes

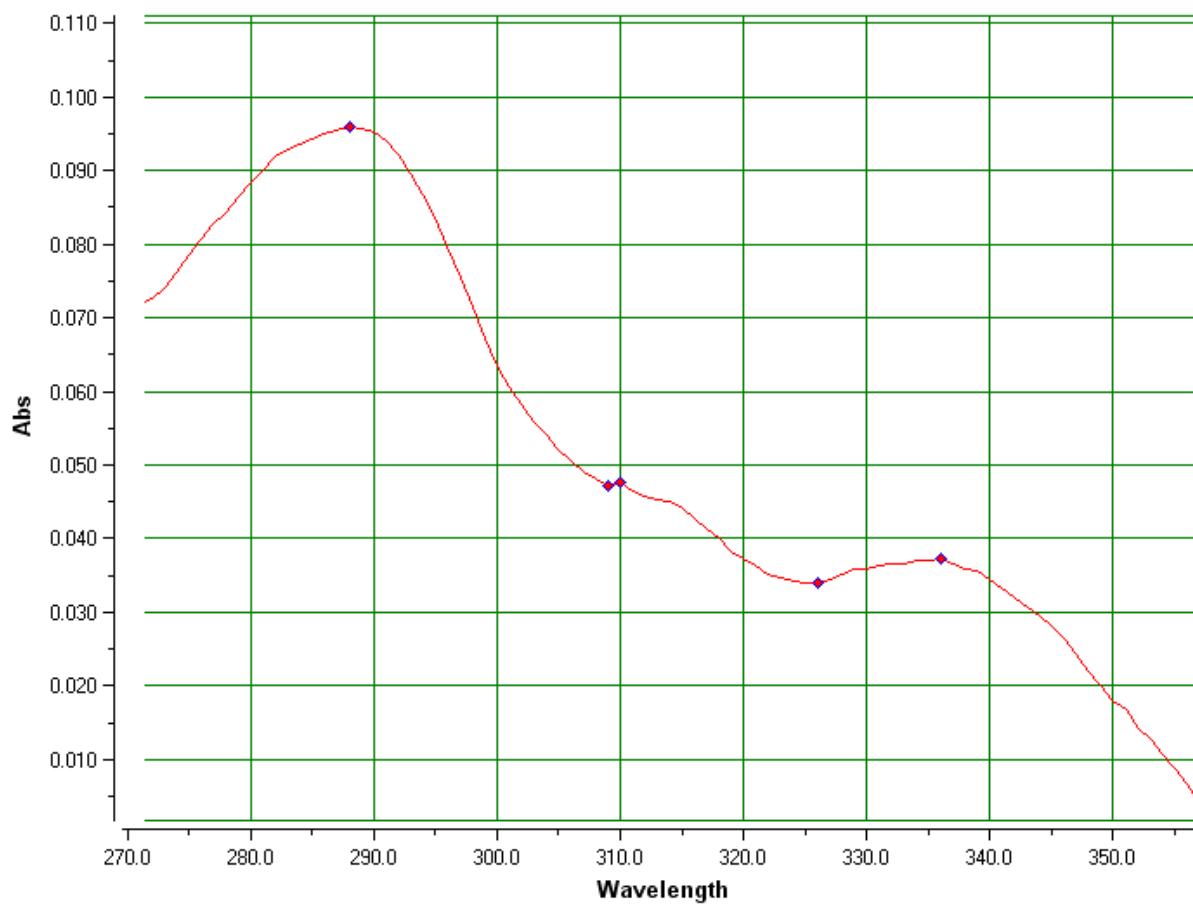

PotassiumHydrogen-[(oxamido-*N*-aminopropyl-*N'*-benzoato)palladium(II)]trihydrate,  
 $\text{KH}[\text{Pd}(\text{obap})]_2 \cdot 3\text{H}_2\text{O}$  (**3**)

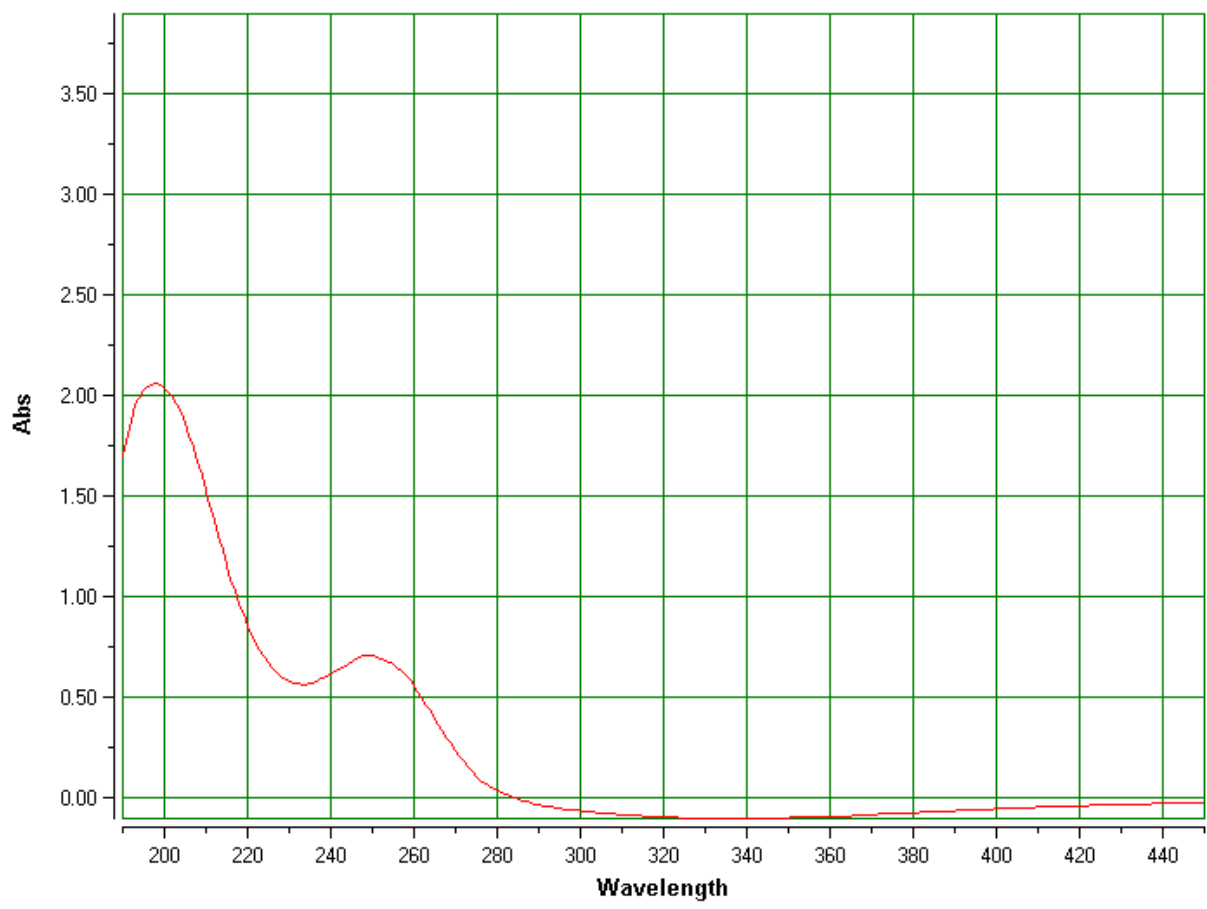

*N,N'*-bis(3-aminopropyl)oxamide palladium(II), [Pd(apox)] (**4**)

**Figure S6.** Distribution diagrams of the H<sub>3</sub>obap and H<sub>2</sub>apox ligands

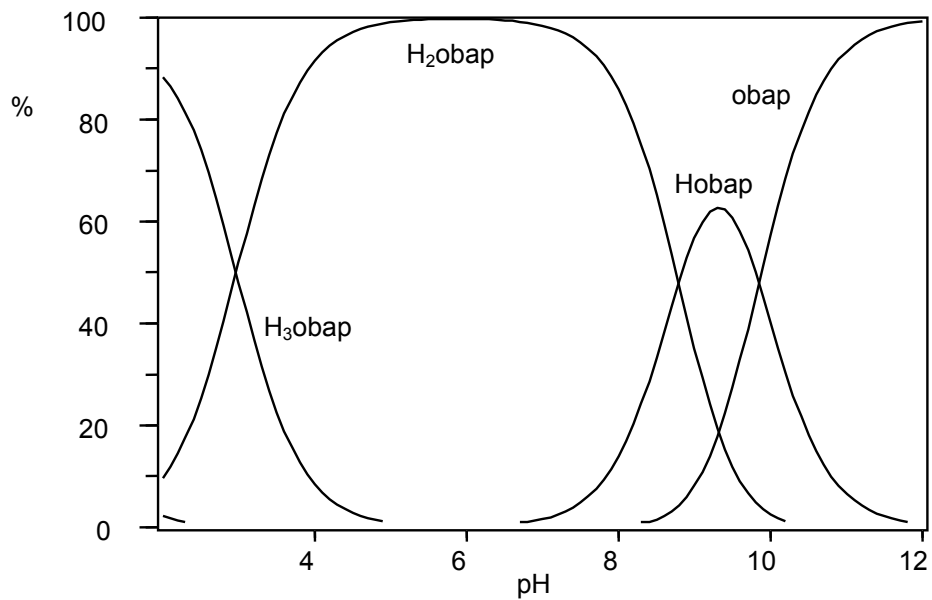

Distribution diagram for H<sub>3</sub>obap. The concentration H<sub>3</sub>obap is 1.0 mmol dm<sup>-3</sup>.

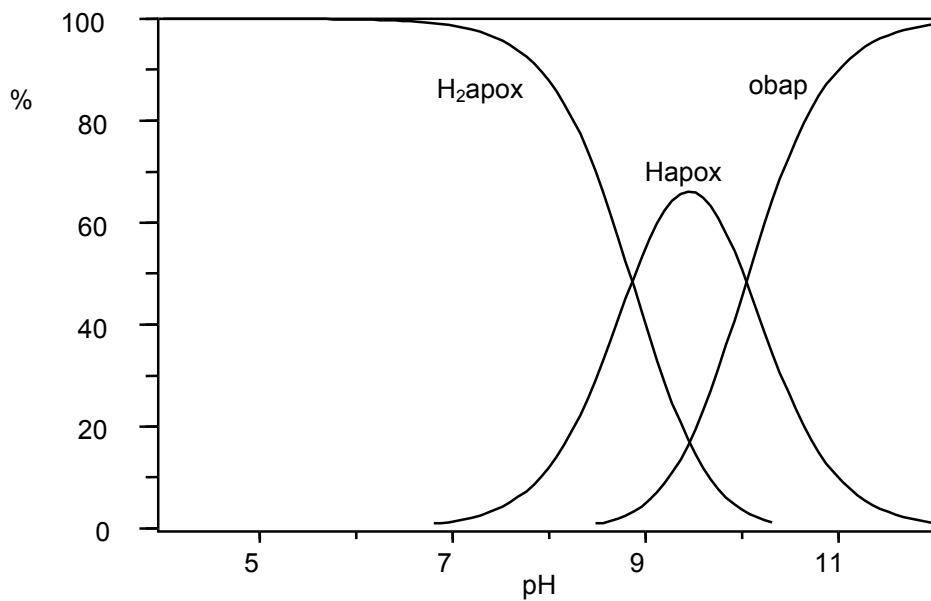

Distribution diagram for H<sub>2</sub>apox. The concentration H<sub>2</sub>apox is 1.0 mmol dm<sup>-3</sup>.

**Figure S7.** Distribution diagrams of the Adenosine and Cytidine

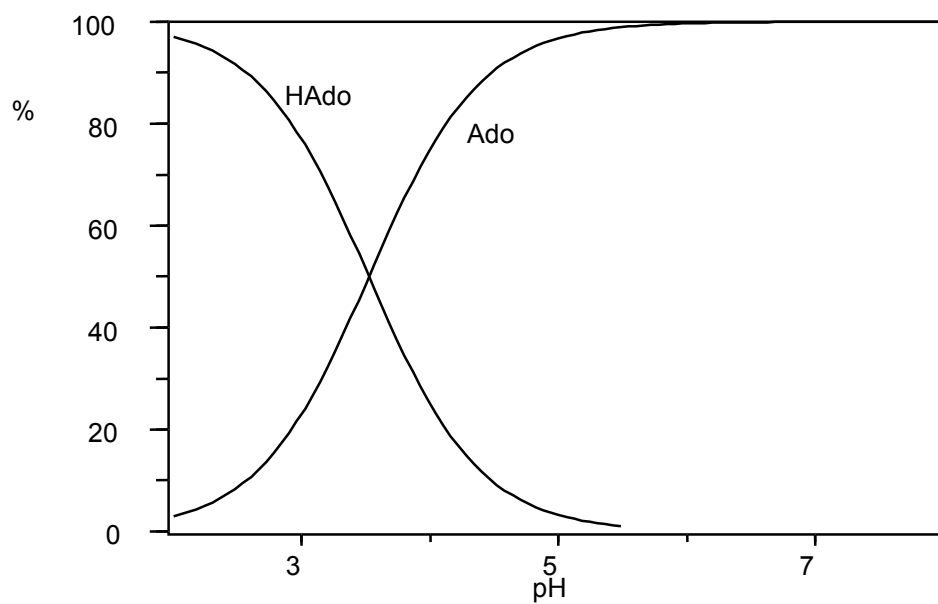

**Fig. 1c.** Distribution diagram for HAdo. The concentration HAdo is 2.5 mmol dm<sup>-3</sup>.

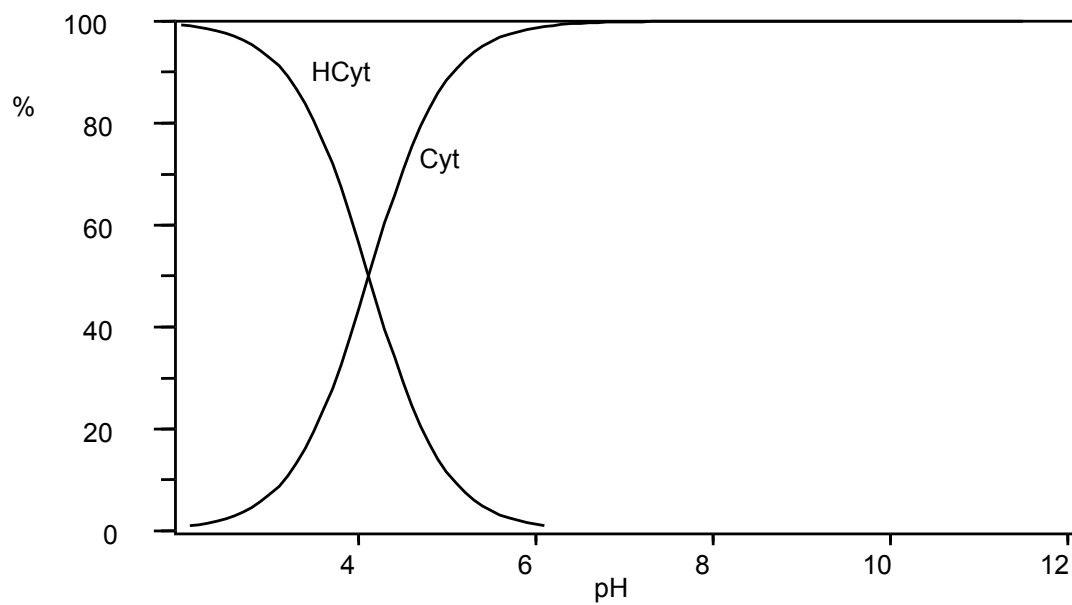

**Fig. 1d.** Distribution diagram for HCyt. The concentration HCyt is 2.5 mmol dm<sup>-3</sup>.

**Figure S8.** Distribution diagram of the Pd-adenosine and Pd-cytidine complexes

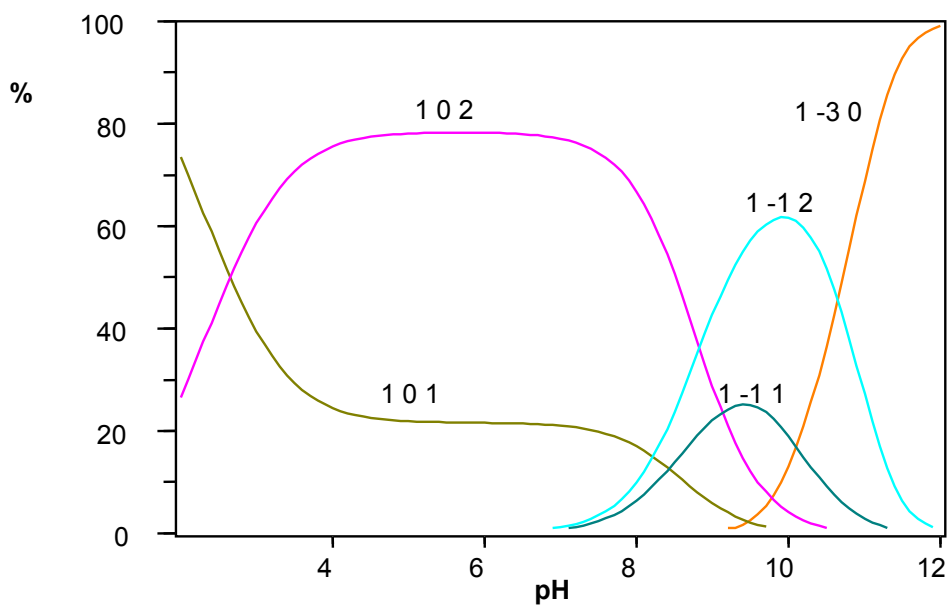

Distribution diagram of Pd - Ado species at ligand-to-metal concentration ratio = 2:1 and total palladium concentration 1.0 mmol dm<sup>-3</sup>

**Figure S9.** Distribution diagram of the Pd-cytidine complex

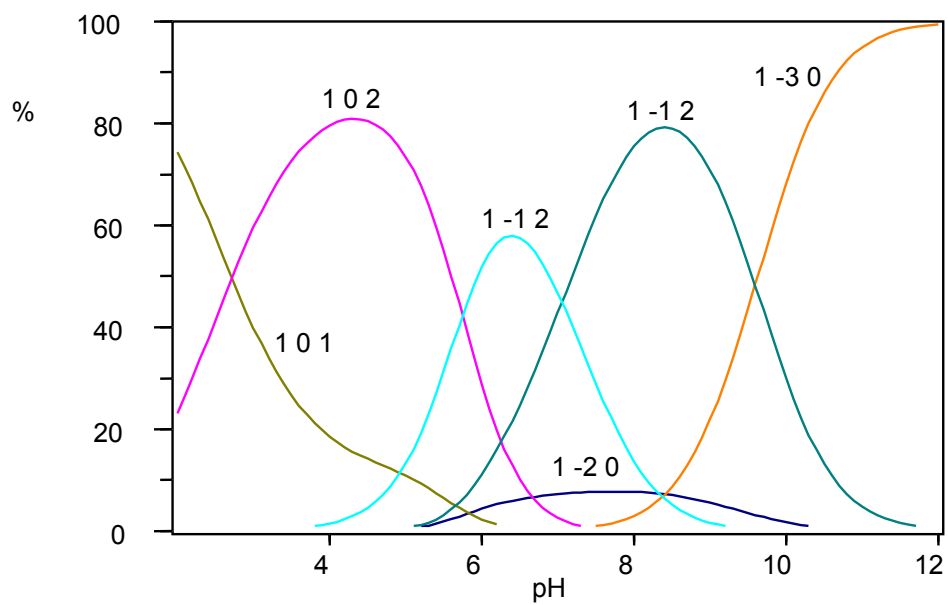

Distribution diagram of Pd - Cyt species at ligand-to-metal concentration ratio = 2:1 and total palladium concentration 1.0 mmol dm<sup>-3</sup>

**Figure S10.** Distribution diagram of the Pd(II) - apox – Ado and Cyt system

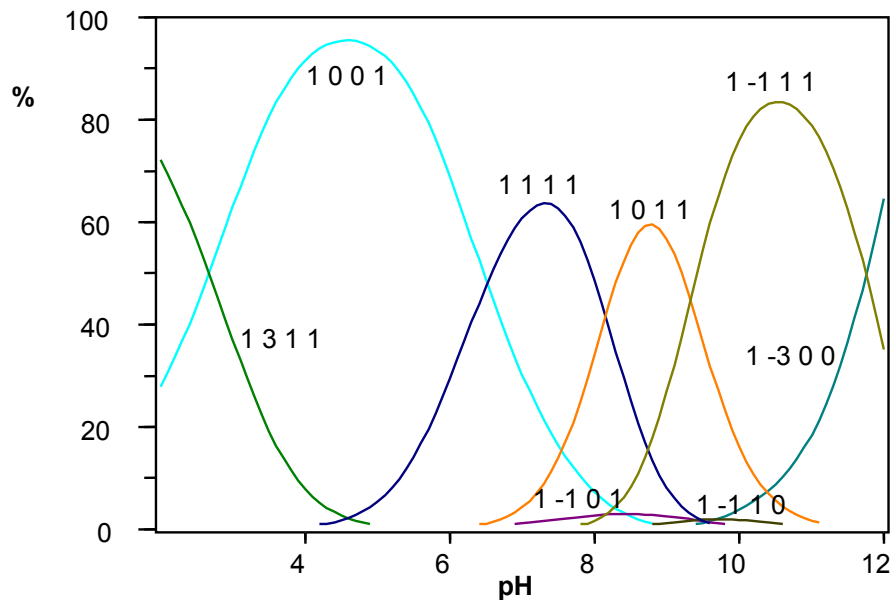

Distribution diagram of Pd - apox - Ado species at Ado-to-apox-to-metal concentration ratio = 1:1:1 and total palladium concentration 1.0 mmol dm<sup>-3</sup>

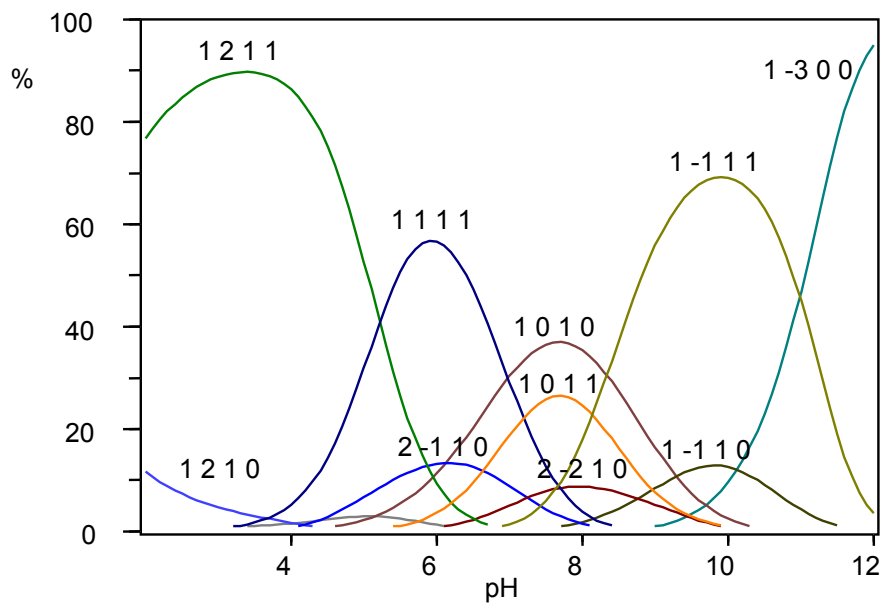

Distribution diagram of Pd - apox - Cyt species at Cyt-to-apox-to-metal concentration ratio = 1:1:1 and total palladium concentration 1.0 mmol dm<sup>-3</sup>

**Figure S11.** Plots of  $\log (F_0 - F)/F$  versus  $\log [Q]$  of HSA-[Pd(obap)]<sup>-</sup> complex

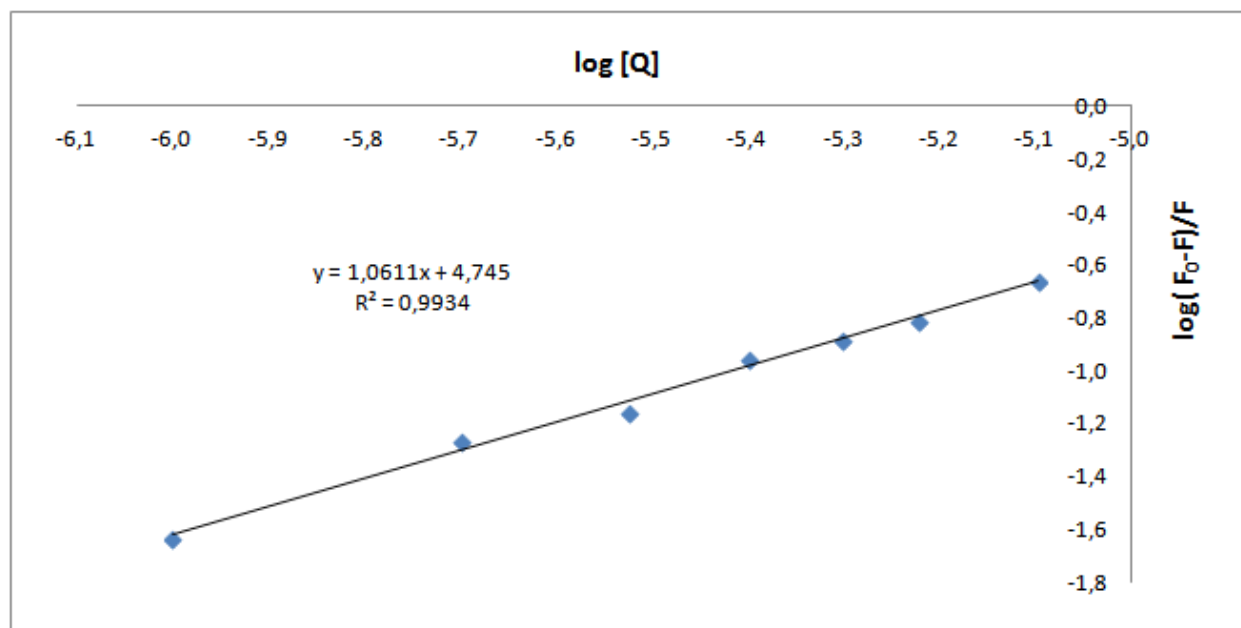

Fig. S12. The DFT optimized conformers of the [Pd(apox)] complex

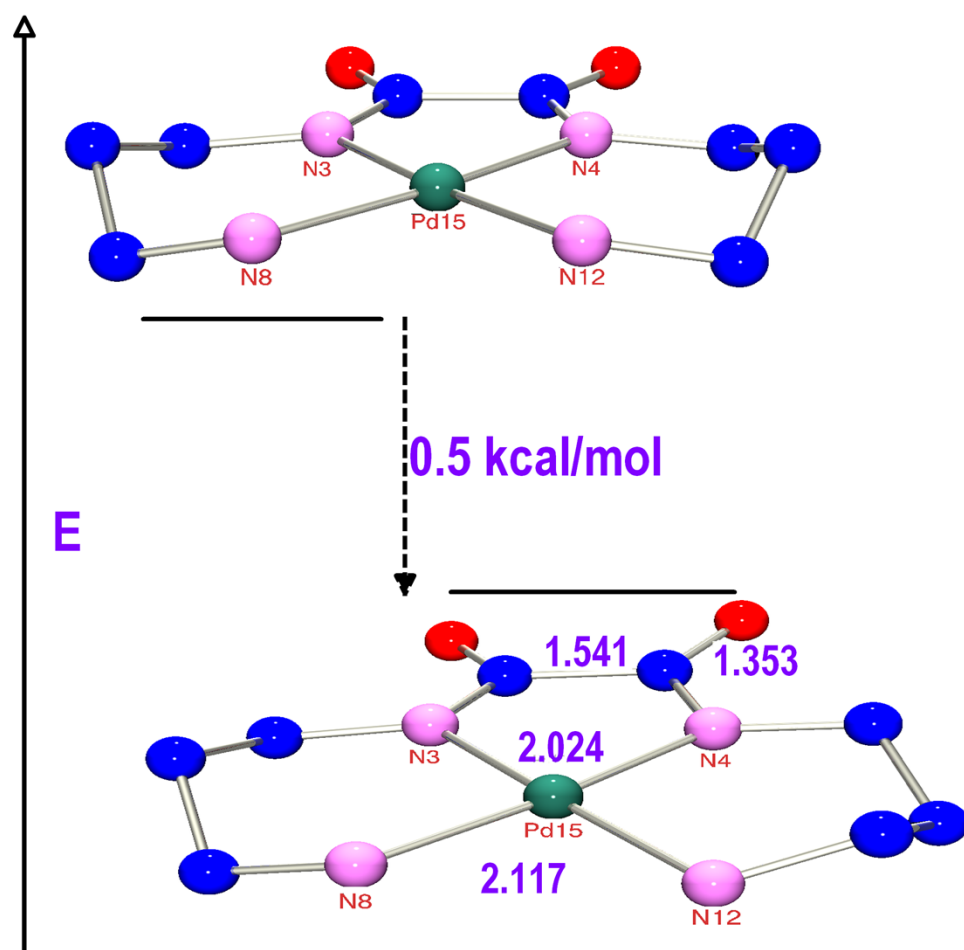



**Table S13** 3-Center, 4-Electron A:-B:-C Hyperbonds (A-B :C  $\rightleftharpoons$  A: B-C) in case of [Pd(apox)] complex.

| No | Hyperbond<br>A:-B:-C | %A-B/%B-C | OCC.  | NBOs                  |                     | 3-center hybrids |      |      |
|----|----------------------|-----------|-------|-----------------------|---------------------|------------------|------|------|
|    |                      |           |       | BD <sup>1</sup> (A-B) | LP <sup>2</sup> (C) | h(A)             | h(B) | h(C) |
| 1  | N 3:- C 1:- O 13     | 49.5/50.5 | 3.981 | 3                     | 56                  | 5                | 6    | 89   |
| 2  | N 4:- C 2:- O 14     | 49.3/50.7 | 3.981 | 6                     | 59                  | 11               | 12   | 92   |
| 3  | N 3:-Pd 15:- N 12    | 55.8/44.2 | 3.974 | 9                     | 53                  | 17               | 18   | 86   |
| 4  | N 4:-Pd 15:- N 8     | 55.9/44.1 | 3.970 | 11                    | 52                  | 21               | 22   | 85   |

<sup>1</sup>BD means Bonding orbital <sup>2</sup>LP means Lone Pair

#### Table S14. Crystallographic data and tables

A single crystal of complex **KPdOBAP** was selected and mounted on a glass fiber. Diffraction data were collected using a Oxford Diffraction Gemini S four-circle goniometer equipped with Sapphire CCD detector. The crystal to detector distance was 45.0 mm and graphite monochromated MoK $\alpha$  ( $\lambda = 0.71073$  Å) radiation was used for the experiments. The data were reduced using the program CrysAlisPRO [1]. A semiempirical absorption-correction based upon the intensities of equivalent reflections was applied, and the data were corrected for Lorentz, polarization, and background effects. The structure was solved by direct methods using Sir 97 program [2] and refined by full-matrix least-squares procedures on  $F^2$  using SHELXL-97 programs [3] as implemented in the WinGX program suite [4]. The non-H atoms were refined anisotropically. At the final stage of the refinement, H atoms were positioned geometrically and refined using a riding model with fixed isotropic displacement parameters (except those involved in disordered water molecules which could not be positioned from a difference Fourier map). Contributions from disordered solvent molecules were removed by the SQUEEZE routine (PLATON) [6] and the output from the SQUEEZE calculations is attached to CIF file. The refinement on the 5463 observed reflections reached at the discrepancy index  $R = 0.0763$ , with rather large e.s.d. on the structural parameters. A subsequent difference Fourier map showed regions of residual electron density (highest value =  $4.6 \text{ e.}\text{\AA}^{-3}$ ), mainly confined in the cavities. This fact was interpreted as the presence of disordered solvent (water). We model this rather unpronounced peaks of the electron density as water oxygen atoms (Ow, OwA, OwB) (Fig. bellow). The  $U(\text{eq})$  value of an OW atom compared with the average  $U(\text{eq})$  for to non-hydrogen atoms is high, but we did not performed any action since it was not of importance.

Crystallographic data and refinement parameters are listed in Table bellow. The figures representing molecular structure were made using ORTEP-3 [5] and PLATON [6] programs.

The perspective view of asymmetric unit cell is shown in Fig. bellow. Selected bond lengths, bond angles and torsion angles are given in Tables bellow.

. Atomic coordinates (  $\times 10^4$ ) and equivalent isotropic displacement parameters ( $\text{\AA}^2 \times 10^3$ ) for KPdOBAP.  $U(\text{eq})$  is defined as one third of the trace of the orthogonalized  $U^{ij}$  tensor.

|       | x         | y        | z        | $U(\text{eq})$ |
|-------|-----------|----------|----------|----------------|
| Pd(2) | 2304(1)   | 4461(1)  | 401(1)   | 31(1)          |
| Pd(1) | -2324(1)  | 10357(1) | -5539(1) | 35(1)          |
| K(1)  | 637(3)    | 11452(2) | -8201(2) | 47(1)          |
| O(2B) | 2061(11)  | 7556(6)  | -726(6)  | 56(2)          |
| O(2A) | -3391(11) | 9628(6)  | -2819(5) | 53(2)          |
| O(1A) | -1021(11) | 8068(6)  | -3337(5) | 51(2)          |
| C(2A) | -2892(14) | 9729(8)  | -3655(7) | 39(2)          |
| N(3A) | -3091(14) | 11870(8) | -6239(6) | 49(2)          |
| O(1B) | 1481(11)  | 6666(6)  | -1933(5) | 51(2)          |
| C(3A) | -667(14)  | 8084(8)  | -5220(7) | 38(2)          |
| O(3A) | -1267(12) | 10116(6) | -6740(5) | 57(2)          |
| O(3B) | 2227(12)  | 3012(6)  | 452(5)   | 52(2)          |
| N(3B) | 2216(15)  | 3926(7)  | 1791(6)  | 48(2)          |
| N(1B) | 2294(10)  | 5015(6)  | -929(5)  | 34(2)          |
| C(8B) | 2429(14)  | 3316(8)  | -1178(7) | 41(2)          |
| N(1A) | -1499(11) | 8897(6)  | -4833(5) | 36(2)          |
| O(4B) | 2262(16)  | 1698(7)  | -50(6)   | 79(3)          |
| N(2A) | -3327(11) | 10538(7) | -4336(6) | 40(2)          |
| O(4A) | 88(16)    | 9281(7)  | -7709(6) | 83(3)          |
| C(1A) | -1630(12) | 8780(8)  | -3937(6) | 34(2)          |
| C(4A) | -351(16)  | 7042(8)  | -4658(8) | 48(3)          |
| C(8A) | -142(15)  | 8248(8)  | -6166(7) | 43(3)          |
| C(2B) | 2133(13)  | 6568(8)  | -487(7)  | 37(2)          |
| C(7A) | 670(20)   | 7391(10) | -6478(9) | 63(4)          |
| C(5A) | 460(19)   | 6232(9)  | -5014(9) | 59(3)          |
| N(2B) | 2380(11)  | 5909(6)  | 295(5)   | 36(2)          |
| C(7B) | 2594(18)  | 2787(10) | -1821(9) | 61(3)          |
| C(9B) | 2310(15)  | 2673(9)  | -222(8)  | 47(3)          |
| C(3B) | 2449(12)  | 4389(8)  | -1511(6) | 35(2)          |
| C(4B) | 2737(17)  | 4840(10) | -2473(7) | 55(3)          |
| C(6B) | 2848(19)  | 3206(11) | -2746(9) | 67(4)          |

|        |           |           |          |         |
|--------|-----------|-----------|----------|---------|
| C(5B)  | 2930(19)  | 4252(12)  | -3046(8) | 67(4)   |
| C(1B)  | 1941(13)  | 6074(7)   | -1203(6) | 35(2)   |
| C(9A)  | -467(17)  | 9276(9)   | -6896(8) | 50(3)   |
| C(11A) | -4400(20) | 12440(10) | -4868(9) | 71(4)   |
| C(12A) | -4551(15) | 11461(8)  | -4158(8) | 47(3)   |
| C(10A) | -4570(20) | 12535(10) | -5789(9) | 74(4)   |
| C(6A)  | 1040(20)  | 6399(10)  | -5941(9) | 70(4)   |
| C(12B) | 2700(17)  | 6285(9)   | 1009(8)  | 52(3)   |
| C(11B) | 2960(40)  | 5486(13)  | 1860(9)  | 127(10) |
| C(10B) | 2470(40)  | 4611(13)  | 2275(11) | 122(9)  |
| OW1    | -4025(17) | 8407(9)   | -3545(7) | 91(4)   |
| OW2    | 4310(17)  | 6378(9)   | -1564(7) | 94(4)   |
| OW     | -153(18)  | 7610(7)   | -2459(7) | 105(5)  |

---

Bond lengths [Å] and angles [°] for KPdOBAP.

---

|              |           |
|--------------|-----------|
| Pd(2)-N(2B)  | 1.957(8)  |
| Pd(2)-O(3B)  | 1.981(7)  |
| Pd(2)-N(1B)  | 1.983(8)  |
| Pd(2)-N(3B)  | 2.061(9)  |
| Pd(1)-N(2A)  | 1.962(9)  |
| Pd(1)-N(1A)  | 1.984(8)  |
| Pd(1)-O(3A)  | 1.995(8)  |
| Pd(1)-N(3A)  | 2.028(9)  |
| K(1)-OW#1    | 1.829(10) |
| K(1)-O(1B)#1 | 2.773(8)  |
| K(1)-O(1A)#1 | 2.792(9)  |
| K(1)-O(2B)#1 | 2.807(9)  |
| K(1)-O(3B)#2 | 2.807(8)  |
| K(1)-O(2A)#1 | 2.809(8)  |
| K(1)-O(3A)   | 2.834(8)  |
| K(1)-O(4B)#2 | 2.867(10) |
| K(1)-O(4A)   | 2.944(10) |
| K(1)-C(9A)   | 3.231(11) |
| K(1)-C(9B)#2 | 3.242(12) |
| K(1)-C(2B)#1 | 3.449(10) |
| O(2B)-C(2B)  | 1.277(12) |
| O(2B)-K(1)#1 | 2.807(9)  |
| O(2A)-C(2A)  | 1.262(13) |
| O(2A)-K(1)#1 | 2.809(8)  |
| O(1A)-C(1A)  | 1.205(11) |
| O(1A)-OW     | 1.551(10) |
| O(1A)-K(1)#1 | 2.792(9)  |
| C(2A)-N(2A)  | 1.308(13) |
| C(2A)-C(1A)  | 1.570(14) |
| C(2A)-K(1)#1 | 3.474(10) |
| N(3A)-C(10A) | 1.506(17) |
| N(3A)-H(3B)  | 0.90(2)   |
| N(3A)-H(3A)  | 0.90(2)   |
| O(1B)-C(1B)  | 1.243(11) |

|              |           |
|--------------|-----------|
| O(1B)-OW     | 1.730(11) |
| O(1B)-K(1)#1 | 2.773(8)  |
| C(3A)-N(1A)  | 1.405(14) |
| C(3A)-C(4A)  | 1.416(14) |
| C(3A)-C(8A)  | 1.416(14) |
| O(3A)-C(9A)  | 1.251(14) |
| O(3B)-C(9B)  | 1.272(14) |
| O(3B)-K(1)#3 | 2.807(8)  |
| N(3B)-C(10B) | 1.454(18) |
| N(3B)-H(3C)  | 0.91(2)   |
| N(3B)-H(3D)  | 0.91(2)   |
| N(1B)-C(1B)  | 1.356(12) |
| N(1B)-C(3B)  | 1.414(13) |
| C(8B)-C(7B)  | 1.393(16) |
| C(8B)-C(3B)  | 1.400(14) |
| C(8B)-C(9B)  | 1.475(15) |
| N(1A)-C(1A)  | 1.349(12) |
| O(4B)-C(9B)  | 1.287(14) |
| O(4B)-K(1)#3 | 2.867(10) |
| N(2A)-C(12A) | 1.469(14) |
| O(4A)-C(9A)  | 1.260(14) |
| C(1A)-K(1)#1 | 3.508(10) |
| C(4A)-C(5A)  | 1.370(17) |
| C(4A)-H(4A)  | 0.9300    |
| C(8A)-C(7A)  | 1.386(17) |
| C(8A)-C(9A)  | 1.512(14) |
| C(2B)-N(2B)  | 1.293(12) |
| C(2B)-C(1B)  | 1.537(14) |
| C(2B)-K(1)#1 | 3.449(10) |
| C(7A)-C(6A)  | 1.353(17) |
| C(7A)-H(7A)  | 0.9300    |
| C(5A)-C(6A)  | 1.393(18) |
| C(5A)-H(5A)  | 0.9300    |
| N(2B)-C(12B) | 1.465(14) |
| C(7B)-C(6B)  | 1.372(17) |
| C(7B)-H(7B)  | 0.9300    |

|                   |           |
|-------------------|-----------|
| C(9B)-K(1)#3      | 3.242(12) |
| C(3B)-C(4B)       | 1.429(14) |
| C(4B)-C(5B)       | 1.356(18) |
| C(4B)-H(4B)       | 0.9300    |
| C(6B)-C(5B)       | 1.374(19) |
| C(6B)-H(6B)       | 0.9300    |
| C(5B)-H(5B)       | 0.9300    |
| C(1B)-K(1)#1      | 3.472(10) |
| C(11A)-C(10A)     | 1.44(2)   |
| C(11A)-C(12A)     | 1.457(16) |
| C(11A)-H(11A)     | 0.9700    |
| C(11A)-H(11B)     | 0.9700    |
| C(12A)-H(12A)     | 0.9700    |
| C(12A)-H(12B)     | 0.9700    |
| C(10A)-H(10A)     | 0.9700    |
| C(10A)-H(10B)     | 0.9700    |
| C(6A)-H(6A)       | 0.9300    |
| C(12B)-C(11B)     | 1.451(18) |
| C(12B)-H(12C)     | 0.9700    |
| C(12B)-H(12D)     | 0.9700    |
| C(11B)-C(10B)     | 1.28(2)   |
| C(11B)-H(11C)     | 0.9700    |
| C(11B)-H(11D)     | 0.9700    |
| C(10B)-H(10C)     | 0.9700    |
| C(10B)-H(10D)     | 0.9700    |
| OW-K(1)#1         | 1.829(10) |
|                   |           |
| N(2B)-Pd(2)-O(3B) | 177.6(3)  |
| N(2B)-Pd(2)-N(1B) | 83.1(3)   |
| O(3B)-Pd(2)-N(1B) | 94.5(3)   |
| N(2B)-Pd(2)-N(3B) | 95.8(4)   |
| O(3B)-Pd(2)-N(3B) | 86.6(3)   |
| N(1B)-Pd(2)-N(3B) | 177.6(4)  |
| N(2A)-Pd(1)-N(1A) | 83.5(3)   |
| N(2A)-Pd(1)-O(3A) | 177.8(3)  |
| N(1A)-Pd(1)-O(3A) | 94.3(3)   |

|                      |          |
|----------------------|----------|
| N(2A)-Pd(1)-N(3A)    | 95.6(4)  |
| N(1A)-Pd(1)-N(3A)    | 177.5(4) |
| O(3A)-Pd(1)-N(3A)    | 86.6(4)  |
| OW#1-K(1)-O(1B)#1    | 37.6(3)  |
| OW#1-K(1)-O(1A)#1    | 31.2(3)  |
| O(1B)#1-K(1)-O(1A)#1 | 68.3(2)  |
| OW#1-K(1)-O(2B)#1    | 95.8(3)  |
| O(1B)#1-K(1)-O(2B)#1 | 58.4(2)  |
| O(1A)#1-K(1)-O(2B)#1 | 125.4(3) |
| OW#1-K(1)-O(3B)#2    | 83.8(4)  |
| O(1B)#1-K(1)-O(3B)#2 | 74.3(2)  |
| O(1A)#1-K(1)-O(3B)#2 | 99.3(2)  |
| O(2B)#1-K(1)-O(3B)#2 | 78.5(2)  |
| OW#1-K(1)-O(2A)#1    | 87.5(3)  |
| O(1B)#1-K(1)-O(2A)#1 | 124.8(3) |
| O(1A)#1-K(1)-O(2A)#1 | 57.9(2)  |
| O(2B)#1-K(1)-O(2A)#1 | 176.7(3) |
| O(3B)#2-K(1)-O(2A)#1 | 101.9(3) |
| OW#1-K(1)-O(3A)      | 88.6(4)  |
| O(1B)#1-K(1)-O(3A)   | 97.6(2)  |
| O(1A)#1-K(1)-O(3A)   | 75.6(2)  |
| O(2B)#1-K(1)-O(3A)   | 99.0(3)  |
| O(3B)#2-K(1)-O(3A)   | 171.7(3) |
| O(2A)#1-K(1)-O(3A)   | 81.0(2)  |
| OW#1-K(1)-O(4B)#2    | 128.9(4) |
| O(1B)#1-K(1)-O(4B)#2 | 108.7(2) |
| O(1A)#1-K(1)-O(4B)#2 | 139.5(3) |
| O(2B)#1-K(1)-O(4B)#2 | 73.6(3)  |
| O(3B)#2-K(1)-O(4B)#2 | 45.2(2)  |
| O(2A)#1-K(1)-O(4B)#2 | 104.3(3) |
| O(3A)-K(1)-O(4B)#2   | 141.9(3) |
| OW#1-K(1)-O(4A)      | 131.6(4) |
| O(1B)#1-K(1)-O(4A)   | 135.0(3) |
| O(1A)#1-K(1)-O(4A)   | 110.2(2) |
| O(2B)#1-K(1)-O(4A)   | 99.3(3)  |
| O(3B)#2-K(1)-O(4A)   | 144.3(3) |



|                      |          |
|----------------------|----------|
| O(2A)#1-K(1)-O(4A)   | 78.4(3)  |
| O(3A)-K(1)-O(4A)     | 43.8(3)  |
| O(4B)#2-K(1)-O(4A)   | 99.5(3)  |
| OW#1-K(1)-C(9A)      | 108.7(4) |
| O(1B)#1-K(1)-C(9A)   | 119.9(3) |
| O(1A)#1-K(1)-C(9A)   | 88.9(3)  |
| O(2B)#1-K(1)-C(9A)   | 106.4(3) |
| O(3B)#2-K(1)-C(9A)   | 165.7(3) |
| O(2A)#1-K(1)-C(9A)   | 72.4(3)  |
| O(3A)-K(1)-C(9A)     | 22.6(3)  |
| O(4B)#2-K(1)-C(9A)   | 122.4(3) |
| O(4A)-K(1)-C(9A)     | 23.0(3)  |
| OW#1-K(1)-C(9B)#2    | 105.7(4) |
| O(1B)#1-K(1)-C(9B)#2 | 88.4(3)  |
| O(1A)#1-K(1)-C(9B)#2 | 121.7(3) |
| O(2B)#1-K(1)-C(9B)#2 | 70.2(3)  |
| O(3B)#2-K(1)-C(9B)#2 | 22.9(3)  |
| O(2A)#1-K(1)-C(9B)#2 | 108.9(3) |
| O(3A)-K(1)-C(9B)#2   | 162.6(3) |
| O(4B)#2-K(1)-C(9B)#2 | 23.3(3)  |
| O(4A)-K(1)-C(9B)#2   | 122.7(3) |
| C(9A)-K(1)-C(9B)#2   | 145.6(3) |
| OW#1-K(1)-C(2B)#1    | 80.5(3)  |
| O(1B)#1-K(1)-C(2B)#1 | 43.5(2)  |
| O(1A)#1-K(1)-C(2B)#1 | 111.7(2) |
| O(2B)#1-K(1)-C(2B)#1 | 20.4(2)  |
| O(3B)#2-K(1)-C(2B)#1 | 63.5(2)  |
| O(2A)#1-K(1)-C(2B)#1 | 161.9(3) |
| O(3A)-K(1)-C(2B)#1   | 112.0(3) |
| O(4B)#2-K(1)-C(2B)#1 | 73.7(3)  |
| O(4A)-K(1)-C(2B)#1   | 119.7(3) |
| C(9A)-K(1)-C(2B)#1   | 124.3(3) |
| C(9B)#2-K(1)-C(2B)#1 | 62.2(3)  |
| C(2B)-O(2B)-K(1)#1   | 109.5(7) |
| C(2A)-O(2A)-K(1)#1   | 111.4(7) |
| C(1A)-O(1A)-OW       | 153.1(9) |

|                    |           |
|--------------------|-----------|
| C(1A)-O(1A)-K(1)#1 | 117.0(7)  |
| OW-O(1A)-K(1)#1    | 37.7(4)   |
| O(2A)-C(2A)-N(2A)  | 127.6(10) |
| O(2A)-C(2A)-C(1A)  | 117.9(8)  |
| N(2A)-C(2A)-C(1A)  | 114.5(9)  |
| O(2A)-C(2A)-K(1)#1 | 48.8(5)   |
| N(2A)-C(2A)-K(1)#1 | 150.4(7)  |
| C(1A)-C(2A)-K(1)#1 | 78.2(5)   |
| C(10A)-N(3A)-Pd(1) | 118.4(7)  |
| C(10A)-N(3A)-H(3B) | 101(10)   |
| Pd(1)-N(3A)-H(3B)  | 105(10)   |
| C(10A)-N(3A)-H(3A) | 102(7)    |
| Pd(1)-N(3A)-H(3A)  | 111(7)    |
| H(3B)-N(3A)-H(3A)  | 120(10)   |
| C(1B)-O(1B)-OW     | 146.4(9)  |
| C(1B)-O(1B)-K(1)#1 | 114.2(7)  |
| OW-O(1B)-K(1)#1    | 40.1(4)   |
| N(1A)-C(3A)-C(4A)  | 119.9(9)  |
| N(1A)-C(3A)-C(8A)  | 123.0(9)  |
| C(4A)-C(3A)-C(8A)  | 117.1(10) |
| C(9A)-O(3A)-Pd(1)  | 127.8(7)  |
| C(9A)-O(3A)-K(1)   | 96.8(7)   |
| Pd(1)-O(3A)-K(1)   | 126.4(4)  |
| C(9B)-O(3B)-Pd(2)  | 126.3(7)  |
| C(9B)-O(3B)-K(1)#3 | 98.1(7)   |
| Pd(2)-O(3B)-K(1)#3 | 131.3(4)  |
| C(10B)-N(3B)-Pd(2) | 119.4(8)  |
| C(10B)-N(3B)-H(3C) | 104(5)    |
| Pd(2)-N(3B)-H(3C)  | 109(6)    |
| C(10B)-N(3B)-H(3D) | 102(8)    |
| Pd(2)-N(3B)-H(3D)  | 94(8)     |
| H(3C)-N(3B)-H(3D)  | 130(10)   |
| C(1B)-N(1B)-C(3B)  | 123.6(8)  |
| C(1B)-N(1B)-Pd(2)  | 111.7(6)  |
| C(3B)-N(1B)-Pd(2)  | 124.4(6)  |
| C(7B)-C(8B)-C(3B)  | 116.6(10) |

|                    |           |
|--------------------|-----------|
| C(7B)-C(8B)-C(9B)  | 116.1(10) |
| C(3B)-C(8B)-C(9B)  | 127.3(10) |
| C(1A)-N(1A)-C(3A)  | 122.2(8)  |
| C(1A)-N(1A)-Pd(1)  | 113.0(7)  |
| C(3A)-N(1A)-Pd(1)  | 124.4(6)  |
| C(9B)-O(4B)-K(1)#3 | 95.0(7)   |
| C(2A)-N(2A)-C(12A) | 119.5(9)  |
| C(2A)-N(2A)-Pd(1)  | 114.8(7)  |
| C(12A)-N(2A)-Pd(1) | 125.7(7)  |
| C(9A)-O(4A)-K(1)   | 91.4(7)   |
| O(1A)-C(1A)-N(1A)  | 131.2(10) |
| O(1A)-C(1A)-C(2A)  | 116.8(9)  |
| N(1A)-C(1A)-C(2A)  | 111.8(8)  |
| O(1A)-C(1A)-K(1)#1 | 45.2(6)   |
| N(1A)-C(1A)-K(1)#1 | 162.8(6)  |
| C(2A)-C(1A)-K(1)#1 | 75.8(5)   |
| C(5A)-C(4A)-C(3A)  | 121.3(11) |
| C(5A)-C(4A)-H(4A)  | 119.4     |
| C(3A)-C(4A)-H(4A)  | 119.4     |
| C(7A)-C(8A)-C(3A)  | 118.4(10) |
| C(7A)-C(8A)-C(9A)  | 115.3(11) |
| C(3A)-C(8A)-C(9A)  | 126.2(11) |
| O(2B)-C(2B)-N(2B)  | 127.8(10) |
| O(2B)-C(2B)-C(1B)  | 117.7(9)  |
| N(2B)-C(2B)-C(1B)  | 114.5(9)  |
| O(2B)-C(2B)-K(1)#1 | 50.1(5)   |
| N(2B)-C(2B)-K(1)#1 | 148.6(7)  |
| C(1B)-C(2B)-K(1)#1 | 78.0(5)   |
| C(6A)-C(7A)-C(8A)  | 124.8(13) |
| C(6A)-C(7A)-H(7A)  | 117.6     |
| C(8A)-C(7A)-H(7A)  | 117.6     |
| C(4A)-C(5A)-C(6A)  | 121.6(11) |
| C(4A)-C(5A)-H(5A)  | 119.2     |
| C(6A)-C(5A)-H(5A)  | 119.2     |
| C(2B)-N(2B)-C(12B) | 119.0(9)  |
| C(2B)-N(2B)-Pd(2)  | 115.1(7)  |

|                      |           |
|----------------------|-----------|
| C(12B)-N(2B)-Pd(2)   | 125.9(7)  |
| C(6B)-C(7B)-C(8B)    | 126.4(12) |
| C(6B)-C(7B)-H(7B)    | 116.8     |
| C(8B)-C(7B)-H(7B)    | 116.8     |
| O(3B)-C(9B)-O(4B)    | 117.1(10) |
| O(3B)-C(9B)-C(8B)    | 124.9(10) |
| O(4B)-C(9B)-C(8B)    | 118.0(10) |
| O(3B)-C(9B)-K(1)#3   | 59.0(6)   |
| O(4B)-C(9B)-K(1)#3   | 61.8(6)   |
| C(8B)-C(9B)-K(1)#3   | 160.4(8)  |
| C(8B)-C(3B)-N(1B)    | 122.1(9)  |
| C(8B)-C(3B)-C(4B)    | 117.9(10) |
| N(1B)-C(3B)-C(4B)    | 119.9(9)  |
| C(5B)-C(4B)-C(3B)    | 121.0(12) |
| C(5B)-C(4B)-H(4B)    | 119.5     |
| C(3B)-C(4B)-H(4B)    | 119.5     |
| C(7B)-C(6B)-C(5B)    | 115.2(12) |
| C(7B)-C(6B)-H(6B)    | 122.4     |
| C(5B)-C(6B)-H(6B)    | 122.4     |
| C(4B)-C(5B)-C(6B)    | 122.8(12) |
| C(4B)-C(5B)-H(5B)    | 118.6     |
| C(6B)-C(5B)-H(5B)    | 118.6     |
| O(1B)-C(1B)-N(1B)    | 128.6(10) |
| O(1B)-C(1B)-C(2B)    | 118.1(9)  |
| N(1B)-C(1B)-C(2B)    | 113.3(8)  |
| O(1B)-C(1B)-K(1)#1   | 46.7(5)   |
| N(1B)-C(1B)-K(1)#1   | 156.8(7)  |
| C(2B)-C(1B)-K(1)#1   | 76.3(5)   |
| O(3A)-C(9A)-O(4A)    | 118.2(10) |
| O(3A)-C(9A)-C(8A)    | 123.9(11) |
| O(4A)-C(9A)-C(8A)    | 117.9(11) |
| O(3A)-C(9A)-K(1)     | 60.6(6)   |
| O(4A)-C(9A)-K(1)     | 65.6(6)   |
| C(8A)-C(9A)-K(1)     | 152.4(8)  |
| C(10A)-C(11A)-C(12A) | 120.3(13) |
| C(10A)-C(11A)-H(11A) | 107.3     |

|                      |           |
|----------------------|-----------|
| C(12A)-C(11A)-H(11A) | 107.3     |
| C(10A)-C(11A)-H(11B) | 107.3     |
| C(12A)-C(11A)-H(11B) | 107.3     |
| H(11A)-C(11A)-H(11B) | 106.9     |
| C(11A)-C(12A)-N(2A)  | 115.1(10) |
| C(11A)-C(12A)-H(12A) | 108.5     |
| N(2A)-C(12A)-H(12A)  | 108.5     |
| C(11A)-C(12A)-H(12B) | 108.5     |
| N(2A)-C(12A)-H(12B)  | 108.5     |
| H(12A)-C(12A)-H(12B) | 107.5     |
| C(11A)-C(10A)-N(3A)  | 113.8(11) |
| C(11A)-C(10A)-H(10A) | 108.8     |
| N(3A)-C(10A)-H(10A)  | 108.8     |
| C(11A)-C(10A)-H(10B) | 108.8     |
| N(3A)-C(10A)-H(10B)  | 108.8     |
| H(10A)-C(10A)-H(10B) | 107.7     |
| C(7A)-C(6A)-C(5A)    | 116.7(13) |
| C(7A)-C(6A)-H(6A)    | 121.6     |
| C(5A)-C(6A)-H(6A)    | 121.6     |
| C(11B)-C(12B)-N(2B)  | 114.8(10) |
| C(11B)-C(12B)-H(12C) | 108.6     |
| N(2B)-C(12B)-H(12C)  | 108.6     |
| C(11B)-C(12B)-H(12D) | 108.6     |
| N(2B)-C(12B)-H(12D)  | 108.6     |
| H(12C)-C(12B)-H(12D) | 107.5     |
| C(10B)-C(11B)-C(12B) | 135.7(16) |
| C(10B)-C(11B)-H(11C) | 103.3     |
| C(12B)-C(11B)-H(11C) | 103.3     |
| C(10B)-C(11B)-H(11D) | 103.3     |
| C(12B)-C(11B)-H(11D) | 103.3     |
| H(11C)-C(11B)-H(11D) | 105.2     |
| C(11B)-C(10B)-N(3B)  | 122.1(14) |
| C(11B)-C(10B)-H(10C) | 106.8     |
| N(3B)-C(10B)-H(10C)  | 106.8     |
| C(11B)-C(10B)-H(10D) | 106.8     |
| N(3B)-C(10B)-H(10D)  | 106.8     |

|                      |          |
|----------------------|----------|
| H(10C)-C(10B)-H(10D) | 106.7    |
| O(1A)-OW-O(1B)       | 144.6(8) |
| O(1A)-OW-K(1)#1      | 111.2(6) |
| O(1B)-OW-K(1)#1      | 102.3(5) |

---

Symmetry transformations used to generate equivalent atoms:

#1  $-x, -y+2, -z-1$  #2  $x, y+1, z-1$  #3  $x, y-1, z+1$

Anisotropic displacement parameters ( $\text{\AA}^2 \times 10^3$ ) for KPdOBAP. The anisotropic displacement factor exponent takes the form:  $-2\pi^2 [ h^2 a^{*2} U^{11} + \dots + 2 h k a^* b^* U^{12} ]$

|       | U <sup>11</sup> | U <sup>22</sup> | U <sup>33</sup> | U <sup>23</sup> | U <sup>13</sup> | U <sup>12</sup> |
|-------|-----------------|-----------------|-----------------|-----------------|-----------------|-----------------|
| Pd(2) | 37(1)           | 30(1)           | 24(1)           | 0(1)            | -8(1)           | -9(1)           |
| Pd(1) | 37(1)           | 32(1)           | 29(1)           | 4(1)            | -5(1)           | -8(1)           |
| K(1)  | 63(2)           | 35(1)           | 32(1)           | 3(1)            | -6(1)           | -7(1)           |
| O(2B) | 67(5)           | 33(4)           | 59(5)           | 3(4)            | -14(4)          | -13(4)          |
| O(2A) | 56(5)           | 53(5)           | 40(4)           | -10(4)          | -1(4)           | -1(4)           |
| O(1A) | 62(5)           | 34(4)           | 48(5)           | 3(3)            | -23(4)          | 3(4)            |
| C(2A) | 38(6)           | 33(5)           | 37(6)           | -1(4)           | -4(4)           | -4(4)           |
| N(3A) | 58(6)           | 44(5)           | 29(5)           | 3(4)            | -2(4)           | -2(5)           |
| O(1B) | 64(5)           | 42(4)           | 30(4)           | 3(3)            | -6(4)           | 0(4)            |
| C(3A) | 41(6)           | 36(5)           | 32(5)           | 4(4)            | -8(4)           | -17(5)          |
| O(3A) | 75(6)           | 44(5)           | 43(5)           | -7(4)           | -3(4)           | -6(4)           |
| O(3B) | 77(6)           | 36(4)           | 42(4)           | -3(3)           | -16(4)          | -14(4)          |
| N(3B) | 69(7)           | 37(5)           | 35(5)           | 1(4)            | -22(5)          | -8(5)           |
| N(1B) | 33(4)           | 37(4)           | 25(4)           | -4(3)           | 2(3)            | -7(4)           |
| C(8B) | 36(6)           | 37(6)           | 42(6)           | -6(5)           | -6(5)           | -1(4)           |
| N(1A) | 35(4)           | 38(5)           | 30(4)           | -5(4)           | -1(3)           | -8(4)           |
| O(4B) | 138(10)         | 35(5)           | 59(6)           | -14(4)          | 0(6)            | -16(5)          |
| N(2A) | 38(5)           | 41(5)           | 34(5)           | -1(4)           | -11(4)          | -5(4)           |
| O(4A) | 146(10)         | 58(6)           | 35(5)           | -9(4)           | -4(5)           | -12(6)          |
| C(1A) | 29(5)           | 36(5)           | 25(5)           | 6(4)            | 0(4)            | -9(4)           |
| C(4A) | 60(7)           | 35(6)           | 44(6)           | 1(5)            | -11(5)          | -13(5)          |
| C(8A) | 58(7)           | 36(6)           | 34(6)           | 0(4)            | -10(5)          | -18(5)          |
| C(2B) | 31(5)           | 43(6)           | 30(5)           | -7(4)           | 4(4)            | -6(4)           |
| C(7A) | 95(11)          | 46(7)           | 51(7)           | -18(6)          | -10(7)          | -15(7)          |
| C(5A) | 84(9)           | 30(6)           | 60(8)           | -5(5)           | -17(7)          | -7(6)           |
| N(2B) | 34(4)           | 34(4)           | 34(5)           | 1(4)            | -7(4)           | -10(4)          |
| C(7B) | 70(9)           | 51(7)           | 60(8)           | -26(6)          | 1(7)            | -4(6)           |
| C(9B) | 45(6)           | 45(7)           | 43(6)           | -11(5)          | -3(5)           | 3(5)            |
| C(3B) | 26(5)           | 45(6)           | 28(5)           | -4(4)           | 3(4)            | -10(4)          |
| C(4B) | 73(8)           | 51(7)           | 29(6)           | 0(5)            | -13(6)          | -1(6)           |
| C(6B) | 90(10)          | 56(8)           | 44(7)           | -17(6)          | -8(7)           | 8(7)            |

|        |         |        |        |        |         |          |
|--------|---------|--------|--------|--------|---------|----------|
| C(5B)  | 71(9)   | 83(10) | 33(6)  | -12(6) | -4(6)   | 2(7)     |
| C(1B)  | 35(5)   | 31(5)  | 28(5)  | 2(4)   | -3(4)   | -4(4)    |
| C(9A)  | 65(8)   | 38(6)  | 38(6)  | 5(5)   | -13(6)  | -11(6)   |
| C(11A) | 85(10)  | 50(8)  | 62(9)  | -18(7) | 13(7)   | 4(7)     |
| C(12A) | 45(6)   | 43(6)  | 46(6)  | -8(5)  | -4(5)   | -1(5)    |
| C(10A) | 75(9)   | 50(8)  | 59(9)  | 14(6)  | -3(7)   | 16(7)    |
| C(6A)  | 109(12) | 45(7)  | 57(8)  | -19(6) | -20(8)  | -3(7)    |
| C(12B) | 57(7)   | 51(7)  | 50(7)  | -16(6) | -12(6)  | -6(6)    |
| C(11B) | 300(30) | 81(12) | 37(8)  | -2(7)  | -42(12) | -102(16) |
| C(10B) | 260(30) | 68(11) | 55(10) | 5(8)   | -70(14) | -62(14)  |
| OW1    | 128(10) | 100(8) | 50(6)  | -3(5)  | -16(6)  | -55(7)   |
| OW2    | 125(10) | 102(8) | 53(6)  | 13(6)  | -18(6)  | -63(8)   |
| OW     | 203(14) | 49(6)  | 69(7)  | -15(5) | -104(9) | 37(7)    |

---



Hydrogen coordinates (  $\times 10^4$ ) and isotropic displacement parameters ( $\text{\AA}^2 \times 10^3$ ) for KPdOBAP.

---

|        | x          | y          | z          | U(eq)    |
|--------|------------|------------|------------|----------|
| H(4A)  | -701       | 6904       | -4034      | 58       |
| H(7A)  | 974        | 7506       | -7102      | 75       |
| H(5A)  | 628        | 5555       | -4628      | 71       |
| H(7B)  | 2524       | 2081       | -1601      | 73       |
| H(4B)  | 2793       | 5546       | -2710      | 66       |
| H(6B)  | 2957       | 2810       | -3142      | 80       |
| H(5B)  | 3127       | 4571       | -3667      | 81       |
| H(11A) | -5289      | 12982      | -4679      | 86       |
| H(11B) | -3260      | 12602      | -4881      | 86       |
| H(12A) | -5749      | 11340      | -4070      | 57       |
| H(12B) | -4353      | 11536      | -3595      | 57       |
| H(10A) | -4617      | 13261      | -6144      | 89       |
| H(10B) | -5680      | 12343      | -5788      | 89       |
| H(6A)  | 1650       | 5856       | -6180      | 84       |
| H(12C) | 3737       | 6612       | 789        | 63       |
| H(12D) | 1704       | 6819       | 1124       | 63       |
| H(11C) | 4238       | 5307       | 1824       | 153      |
| H(11D) | 2577       | 5872       | 2307       | 153      |
| H(10C) | 1353       | 4760       | 2655       | 147      |
| H(10D) | 3316       | 4207       | 2681       | 147      |
| H(3C)  | 3090(80)   | 3360(40)   | 1930(60)   | 20(20)   |
| H(3B)  | -2200(200) | 12190(170) | -6290(160) | 180(110) |
| H(3D)  | 1030(40)   | 3970(100)  | 1900(80)   | 60(40)   |
| H(3A)  | -3510(140) | 11910(80)  | -6750(40)  | 40(30)   |
| H(1)   | -6300(130) | 9430(80)   | -2610(70)  | 40(30)   |

---

## Torsion angles [°] for KPdOBAP.

---

|                          |            |
|--------------------------|------------|
| K(1)#1-O(2A)-C(2A)-N(2A) | -141.6(10) |
| K(1)#1-O(2A)-C(2A)-C(1A) | 39.7(11)   |
| N(2A)-Pd(1)-N(3A)-C(10A) | -20.4(11)  |
| N(1A)-Pd(1)-N(3A)-C(10A) | -89(9)     |
| O(3A)-Pd(1)-N(3A)-C(10A) | 159.7(11)  |
| N(2A)-Pd(1)-O(3A)-C(9A)  | 4(10)      |
| N(1A)-Pd(1)-O(3A)-C(9A)  | 3.0(11)    |
| N(3A)-Pd(1)-O(3A)-C(9A)  | -179.3(11) |
| N(2A)-Pd(1)-O(3A)-K(1)   | -136(9)    |
| N(1A)-Pd(1)-O(3A)-K(1)   | -136.3(5)  |
| N(3A)-Pd(1)-O(3A)-K(1)   | 41.3(5)    |
| OW#1-K(1)-O(3A)-C(9A)    | -153.1(8)  |
| O(1B)#1-K(1)-O(3A)-C(9A) | 170.4(7)   |
| O(1A)#1-K(1)-O(3A)-C(9A) | -124.4(7)  |
| O(2B)#1-K(1)-O(3A)-C(9A) | 111.3(7)   |
| O(3B)#2-K(1)-O(3A)-C(9A) | -176.9(16) |
| O(2A)#1-K(1)-O(3A)-C(9A) | -65.4(7)   |
| O(4B)#2-K(1)-O(3A)-C(9A) | 36.4(9)    |
| O(4A)-K(1)-O(3A)-C(9A)   | 17.2(7)    |
| C(9B)#2-K(1)-O(3A)-C(9A) | 61.1(13)   |
| C(2B)#1-K(1)-O(3A)-C(9A) | 127.7(7)   |
| OW#1-K(1)-O(3A)-Pd(1)    | -4.3(6)    |
| O(1B)#1-K(1)-O(3A)-Pd(1) | -40.9(5)   |
| O(1A)#1-K(1)-O(3A)-Pd(1) | 24.3(4)    |
| O(2B)#1-K(1)-O(3A)-Pd(1) | -100.0(5)  |
| O(3B)#2-K(1)-O(3A)-Pd(1) | -28(2)     |
| O(2A)#1-K(1)-O(3A)-Pd(1) | 83.3(5)    |
| O(4B)#2-K(1)-O(3A)-Pd(1) | -174.9(5)  |
| O(4A)-K(1)-O(3A)-Pd(1)   | 165.9(7)   |
| C(9A)-K(1)-O(3A)-Pd(1)   | 148.8(10)  |
| C(9B)#2-K(1)-O(3A)-Pd(1) | -150.2(8)  |
| C(2B)#1-K(1)-O(3A)-Pd(1) | -83.5(5)   |
| N(2B)-Pd(2)-O(3B)-C(9B)  | 5(9)       |
| N(1B)-Pd(2)-O(3B)-C(9B)  | 5.1(10)    |

|                           |            |
|---------------------------|------------|
| N(3B)-Pd(2)-O(3B)-C(9B)   | -177.0(10) |
| N(2B)-Pd(2)-O(3B)-K(1)#3  | -146(8)    |
| N(1B)-Pd(2)-O(3B)-K(1)#3  | -146.6(5)  |
| N(3B)-Pd(2)-O(3B)-K(1)#3  | 31.3(5)    |
| N(2B)-Pd(2)-N(3B)-C(10B)  | -8.1(15)   |
| O(3B)-Pd(2)-N(3B)-C(10B)  | 172.0(15)  |
| N(1B)-Pd(2)-N(3B)-C(10B)  | -70(9)     |
| N(2B)-Pd(2)-N(1B)-C(1B)   | -13.9(7)   |
| O(3B)-Pd(2)-N(1B)-C(1B)   | 166.1(7)   |
| N(3B)-Pd(2)-N(1B)-C(1B)   | 49(9)      |
| N(2B)-Pd(2)-N(1B)-C(3B)   | 172.3(8)   |
| O(3B)-Pd(2)-N(1B)-C(3B)   | -7.7(8)    |
| N(3B)-Pd(2)-N(1B)-C(3B)   | -125(9)    |
| C(4A)-C(3A)-N(1A)-C(1A)   | 16.7(14)   |
| C(8A)-C(3A)-N(1A)-C(1A)   | -164.5(9)  |
| C(4A)-C(3A)-N(1A)-Pd(1)   | -171.2(7)  |
| C(8A)-C(3A)-N(1A)-Pd(1)   | 7.6(13)    |
| N(2A)-Pd(1)-N(1A)-C(1A)   | -13.7(7)   |
| O(3A)-Pd(1)-N(1A)-C(1A)   | 166.3(7)   |
| N(3A)-Pd(1)-N(1A)-C(1A)   | 55(9)      |
| N(2A)-Pd(1)-N(1A)-C(3A)   | 173.6(8)   |
| O(3A)-Pd(1)-N(1A)-C(3A)   | -6.5(8)    |
| N(3A)-Pd(1)-N(1A)-C(3A)   | -117(8)    |
| O(2A)-C(2A)-N(2A)-C(12A)  | -0.7(17)   |
| C(1A)-C(2A)-N(2A)-C(12A)  | 177.9(9)   |
| K(1)#1-C(2A)-N(2A)-C(12A) | -71.7(17)  |
| O(2A)-C(2A)-N(2A)-Pd(1)   | -177.9(9)  |
| C(1A)-C(2A)-N(2A)-Pd(1)   | 0.8(11)    |
| K(1)#1-C(2A)-N(2A)-Pd(1)  | 111.1(14)  |
| N(1A)-Pd(1)-N(2A)-C(2A)   | 6.6(7)     |
| O(3A)-Pd(1)-N(2A)-C(2A)   | 6(9)       |
| N(3A)-Pd(1)-N(2A)-C(2A)   | -171.1(8)  |
| N(1A)-Pd(1)-N(2A)-C(12A)  | -170.3(9)  |
| O(3A)-Pd(1)-N(2A)-C(12A)  | -171(9)    |
| N(3A)-Pd(1)-N(2A)-C(12A)  | 12.0(9)    |
| OW#1-K(1)-O(4A)-C(9A)     | -3.9(11)   |

|                          |            |
|--------------------------|------------|
| O(1B)#1-K(1)-O(4A)-C(9A) | -56.2(9)   |
| O(1A)#1-K(1)-O(4A)-C(9A) | 22.9(9)    |
| O(2B)#1-K(1)-O(4A)-C(9A) | -110.3(8)  |
| O(3B)#2-K(1)-O(4A)-C(9A) | 166.5(7)   |
| O(2A)#1-K(1)-O(4A)-C(9A) | 72.1(8)    |
| O(3A)-K(1)-O(4A)-C(9A)   | -16.9(7)   |
| O(4B)#2-K(1)-O(4A)-C(9A) | 174.9(8)   |
| C(9B)#2-K(1)-O(4A)-C(9A) | 177.3(7)   |
| C(2B)#1-K(1)-O(4A)-C(9A) | -108.5(8)  |
| OW-O(1A)-C(1A)-N(1A)     | 140.7(19)  |
| K(1)#1-O(1A)-C(1A)-N(1A) | 156.9(9)   |
| OW-O(1A)-C(1A)-C(2A)     | -43(2)     |
| K(1)#1-O(1A)-C(1A)-C(2A) | -27.1(11)  |
| OW-O(1A)-C(1A)-K(1)#1    | -16.2(18)  |
| C(3A)-N(1A)-C(1A)-O(1A)  | 6.1(17)    |
| Pd(1)-N(1A)-C(1A)-O(1A)  | -166.9(9)  |
| C(3A)-N(1A)-C(1A)-C(2A)  | -170.1(8)  |
| Pd(1)-N(1A)-C(1A)-C(2A)  | 17.0(10)   |
| C(3A)-N(1A)-C(1A)-K(1)#1 | 76(3)      |
| Pd(1)-N(1A)-C(1A)-K(1)#1 | -97(2)     |
| O(2A)-C(2A)-C(1A)-O(1A)  | -10.0(14)  |
| N(2A)-C(2A)-C(1A)-O(1A)  | 171.2(9)   |
| K(1)#1-C(2A)-C(1A)-O(1A) | 19.5(8)    |
| O(2A)-C(2A)-C(1A)-N(1A)  | 166.8(9)   |
| N(2A)-C(2A)-C(1A)-N(1A)  | -12.0(12)  |
| K(1)#1-C(2A)-C(1A)-N(1A) | -163.8(7)  |
| O(2A)-C(2A)-C(1A)-K(1)#1 | -29.4(8)   |
| N(2A)-C(2A)-C(1A)-K(1)#1 | 151.8(9)   |
| N(1A)-C(3A)-C(4A)-C(5A)  | -179.9(11) |
| C(8A)-C(3A)-C(4A)-C(5A)  | 1.3(16)    |
| N(1A)-C(3A)-C(8A)-C(7A)  | -179.9(11) |
| C(4A)-C(3A)-C(8A)-C(7A)  | -1.1(16)   |
| N(1A)-C(3A)-C(8A)-C(9A)  | -3.6(17)   |
| C(4A)-C(3A)-C(8A)-C(9A)  | 175.2(10)  |
| K(1)#1-O(2B)-C(2B)-N(2B) | -139.4(9)  |
| K(1)#1-O(2B)-C(2B)-C(1B) | 41.8(10)   |

|                           |            |
|---------------------------|------------|
| C(3A)-C(8A)-C(7A)-C(6A)   | -2(2)      |
| C(9A)-C(8A)-C(7A)-C(6A)   | -178.4(13) |
| C(3A)-C(4A)-C(5A)-C(6A)   | 1(2)       |
| O(2B)-C(2B)-N(2B)-C(12B)  | -3.0(16)   |
| C(1B)-C(2B)-N(2B)-C(12B)  | 175.9(9)   |
| K(1)#1-C(2B)-N(2B)-C(12B) | -76.3(16)  |
| O(2B)-C(2B)-N(2B)-Pd(2)   | 177.6(9)   |
| C(1B)-C(2B)-N(2B)-Pd(2)   | -3.6(11)   |
| K(1)#1-C(2B)-N(2B)-Pd(2)  | 104.3(13)  |
| O(3B)-Pd(2)-N(2B)-C(2B)   | 9(9)       |
| N(1B)-Pd(2)-N(2B)-C(2B)   | 9.5(7)     |
| N(3B)-Pd(2)-N(2B)-C(2B)   | -168.3(8)  |
| O(3B)-Pd(2)-N(2B)-C(12B)  | -170(8)    |
| N(1B)-Pd(2)-N(2B)-C(12B)  | -169.9(9)  |
| N(3B)-Pd(2)-N(2B)-C(12B)  | 12.3(9)    |
| C(3B)-C(8B)-C(7B)-C(6B)   | 3(2)       |
| C(9B)-C(8B)-C(7B)-C(6B)   | -175.1(13) |
| Pd(2)-O(3B)-C(9B)-O(4B)   | 179.1(9)   |
| K(1)#3-O(3B)-C(9B)-O(4B)  | -22.0(12)  |
| Pd(2)-O(3B)-C(9B)-C(8B)   | -1.9(16)   |
| K(1)#3-O(3B)-C(9B)-C(8B)  | 157.0(10)  |
| Pd(2)-O(3B)-C(9B)-K(1)#3  | -158.9(9)  |
| K(1)#3-O(4B)-C(9B)-O(3B)  | 21.4(11)   |
| K(1)#3-O(4B)-C(9B)-C(8B)  | -157.7(9)  |
| C(7B)-C(8B)-C(9B)-O(3B)   | 177.0(12)  |
| C(3B)-C(8B)-C(9B)-O(3B)   | -0.9(18)   |
| C(7B)-C(8B)-C(9B)-O(4B)   | -4.0(16)   |
| C(3B)-C(8B)-C(9B)-O(4B)   | 178.2(11)  |
| C(7B)-C(8B)-C(9B)-K(1)#3  | -88(2)     |
| C(3B)-C(8B)-C(9B)-K(1)#3  | 94(2)      |
| C(7B)-C(8B)-C(3B)-N(1B)   | -180.0(10) |
| C(9B)-C(8B)-C(3B)-N(1B)   | -2.1(16)   |
| C(7B)-C(8B)-C(3B)-C(4B)   | -3.5(15)   |
| C(9B)-C(8B)-C(3B)-C(4B)   | 174.3(10)  |
| C(1B)-N(1B)-C(3B)-C(8B)   | -165.8(9)  |
| Pd(2)-N(1B)-C(3B)-C(8B)   | 7.3(13)    |

|                          |            |
|--------------------------|------------|
| C(1B)-N(1B)-C(3B)-C(4B)  | 17.9(14)   |
| Pd(2)-N(1B)-C(3B)-C(4B)  | -169.1(8)  |
| C(8B)-C(3B)-C(4B)-C(5B)  | 2.0(17)    |
| N(1B)-C(3B)-C(4B)-C(5B)  | 178.5(11)  |
| C(8B)-C(7B)-C(6B)-C(5B)  | 0(2)       |
| C(3B)-C(4B)-C(5B)-C(6B)  | 1(2)       |
| C(7B)-C(6B)-C(5B)-C(4B)  | -1(2)      |
| OW-O(1B)-C(1B)-N(1B)     | 116.7(15)  |
| K(1)#1-O(1B)-C(1B)-N(1B) | 149.8(9)   |
| OW-O(1B)-C(1B)-C(2B)     | -62.5(18)  |
| K(1)#1-O(1B)-C(1B)-C(2B) | -29.4(11)  |
| OW-O(1B)-C(1B)-K(1)#1    | -33.1(12)  |
| C(3B)-N(1B)-C(1B)-O(1B)  | 10.1(16)   |
| Pd(2)-N(1B)-C(1B)-O(1B)  | -163.8(9)  |
| C(3B)-N(1B)-C(1B)-C(2B)  | -170.8(8)  |
| Pd(2)-N(1B)-C(1B)-C(2B)  | 15.4(10)   |
| C(3B)-N(1B)-C(1B)-K(1)#1 | 78.7(19)   |
| Pd(2)-N(1B)-C(1B)-K(1)#1 | -95.1(16)  |
| O(2B)-C(2B)-C(1B)-O(1B)  | -9.9(14)   |
| N(2B)-C(2B)-C(1B)-O(1B)  | 171.1(9)   |
| K(1)#1-C(2B)-C(1B)-O(1B) | 21.6(8)    |
| O(2B)-C(2B)-C(1B)-N(1B)  | 170.8(9)   |
| N(2B)-C(2B)-C(1B)-N(1B)  | -8.2(12)   |
| K(1)#1-C(2B)-C(1B)-N(1B) | -157.7(8)  |
| O(2B)-C(2B)-C(1B)-K(1)#1 | -31.5(8)   |
| N(2B)-C(2B)-C(1B)-K(1)#1 | 149.5(8)   |
| Pd(1)-O(3A)-C(9A)-O(4A)  | 179.1(9)   |
| K(1)-O(3A)-C(9A)-O(4A)   | -32.8(13)  |
| Pd(1)-O(3A)-C(9A)-C(8A)  | -0.2(18)   |
| K(1)-O(3A)-C(9A)-C(8A)   | 147.9(10)  |
| Pd(1)-O(3A)-C(9A)-K(1)   | -148.1(10) |
| K(1)-O(4A)-C(9A)-O(3A)   | 31.2(12)   |
| K(1)-O(4A)-C(9A)-C(8A)   | -149.4(9)  |
| C(7A)-C(8A)-C(9A)-O(3A)  | 176.0(12)  |
| C(3A)-C(8A)-C(9A)-O(3A)  | -0.4(19)   |
| C(7A)-C(8A)-C(9A)-O(4A)  | -3.4(17)   |

|                            |            |
|----------------------------|------------|
| C(3A)-C(8A)-C(9A)-O(4A)    | -179.8(11) |
| C(7A)-C(8A)-C(9A)-K(1)     | -93.6(19)  |
| C(3A)-C(8A)-C(9A)-K(1)     | 90(2)      |
| OW#1-K(1)-C(9A)-O(3A)      | 28.5(8)    |
| O(1B)#1-K(1)-C(9A)-O(3A)   | -11.0(8)   |
| O(1A)#1-K(1)-C(9A)-O(3A)   | 53.0(7)    |
| O(2B)#1-K(1)-C(9A)-O(3A)   | -73.6(7)   |
| O(3B)#2-K(1)-C(9A)-O(3A)   | 178.2(9)   |
| O(2A)#1-K(1)-C(9A)-O(3A)   | 109.6(7)   |
| O(4B)#2-K(1)-C(9A)-O(3A)   | -154.3(7)  |
| O(4A)-K(1)-C(9A)-O(3A)     | -148.4(13) |
| C(9B)#2-K(1)-C(9A)-O(3A)   | -152.4(7)  |
| C(2B)#1-K(1)-C(9A)-O(3A)   | -62.6(8)   |
| OW#1-K(1)-C(9A)-O(4A)      | 176.9(9)   |
| O(1B)#1-K(1)-C(9A)-O(4A)   | 137.4(8)   |
| O(1A)#1-K(1)-C(9A)-O(4A)   | -158.6(8)  |
| O(2B)#1-K(1)-C(9A)-O(4A)   | 74.8(9)    |
| O(3B)#2-K(1)-C(9A)-O(4A)   | -33.4(16)  |
| O(2A)#1-K(1)-C(9A)-O(4A)   | -102.0(8)  |
| O(3A)-K(1)-C(9A)-O(4A)     | 148.4(13)  |
| O(4B)#2-K(1)-C(9A)-O(4A)   | -5.9(9)    |
| C(9B)#2-K(1)-C(9A)-O(4A)   | -4.0(11)   |
| C(2B)#1-K(1)-C(9A)-O(4A)   | 85.8(9)    |
| OW#1-K(1)-C(9A)-C(8A)      | -79.1(19)  |
| O(1B)#1-K(1)-C(9A)-C(8A)   | -118.7(18) |
| O(1A)#1-K(1)-C(9A)-C(8A)   | -54.6(18)  |
| O(2B)#1-K(1)-C(9A)-C(8A)   | 178.7(18)  |
| O(3B)#2-K(1)-C(9A)-C(8A)   | 71(2)      |
| O(2A)#1-K(1)-C(9A)-C(8A)   | 1.9(18)    |
| O(3A)-K(1)-C(9A)-C(8A)     | -108(2)    |
| O(4B)#2-K(1)-C(9A)-C(8A)   | 98.0(18)   |
| O(4A)-K(1)-C(9A)-C(8A)     | 104(2)     |
| C(9B)#2-K(1)-C(9A)-C(8A)   | 99.9(18)   |
| C(2B)#1-K(1)-C(9A)-C(8A)   | -170.3(17) |
| C(10A)-C(11A)-C(12A)-N(2A) | 55.9(18)   |
| C(2A)-N(2A)-C(12A)-C(11A)  | 155.5(12)  |

|                            |            |
|----------------------------|------------|
| Pd(1)-N(2A)-C(12A)-C(11A)  | -27.7(15)  |
| C(12A)-C(11A)-C(10A)-N(3A) | -67.1(19)  |
| Pd(1)-N(3A)-C(10A)-C(11A)  | 46.3(17)   |
| C(8A)-C(7A)-C(6A)-C(5A)    | 4(2)       |
| C(4A)-C(5A)-C(6A)-C(7A)    | -4(2)      |
| C(2B)-N(2B)-C(12B)-C(11B)  | -180.0(14) |
| Pd(2)-N(2B)-C(12B)-C(11B)  | -0.6(18)   |
| N(2B)-C(12B)-C(11B)-C(10B) | -28(4)     |
| C(12B)-C(11B)-C(10B)-N(3B) | 33(5)      |
| Pd(2)-N(3B)-C(10B)-C(11B)  | -9(3)      |
| C(1A)-O(1A)-OW-O(1B)       | -135.8(18) |
| K(1)#1-O(1A)-OW-O(1B)      | -160(2)    |
| C(1A)-O(1A)-OW-K(1)#1      | 24(3)      |
| C(1B)-O(1B)-OW-O(1A)       | -148.6(16) |
| K(1)#1-O(1B)-OW-O(1A)      | 161(2)     |
| C(1B)-O(1B)-OW-K(1)#1      | 50.6(18)   |

---

Symmetry transformations used to generate equivalent atoms:

#1 -x,-y+2,-z-1 #2 x,y+1,z-1 #3 x,y-1,z+1



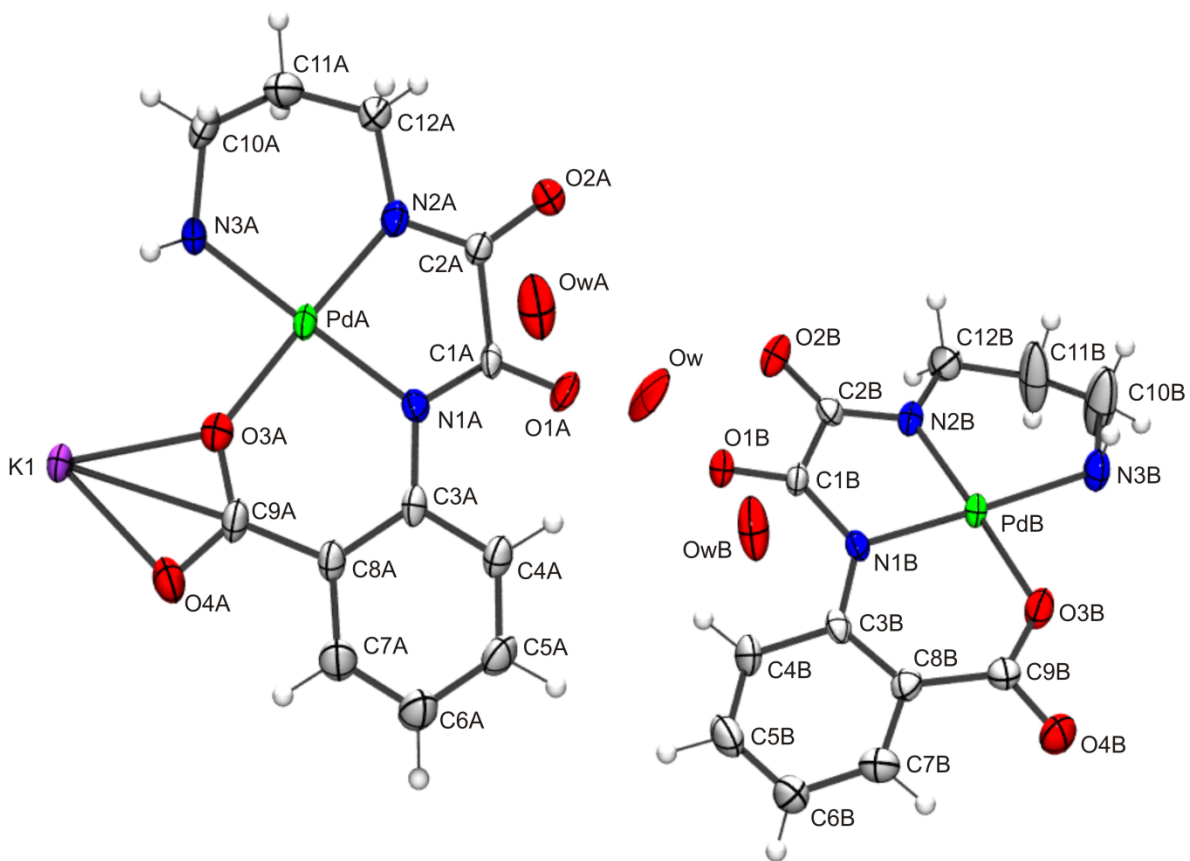

Molecular structure of the complex with the non H atom numbering scheme with thermal ellipsoids at 30% probability level.

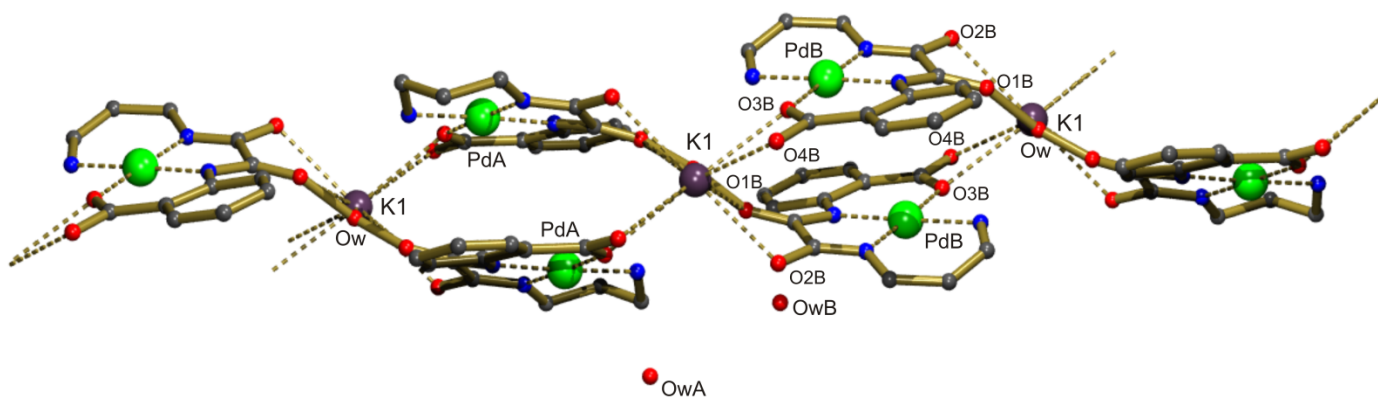

Drawing showing the crystal packing of KPdOBAP complex. Hydrogen atoms are omitted for clarity.

1. Agilent, *CrysAlis PRO*, Agilent Technologies, Yarnton, Oxfordshire, England (2010).
2. (a) A. Altomare, M.C. Burla, M. Cavalli, G. Cascarano, C. Giacovazzo, A. Gagliardi, A.G. Moliterni, G. Polidori, R. Spagna, *Sir97: A New Program For Solving and Refining Crystal Structures*, Istituto di Ricerca per lo Sviluppo di Metodologie Cristallografiche CNR, Bari (1997).  
(b) A. Altomare, M.C. Burla, M. Cavalli, G. Cascarano, C. Giacovazzo, A. Gagliardi, A.G.G. Moliterni, G. Polidori, R. Spagna, *J. Appl. Cryst.*, **32**, 115 (1999).
3. G.M. Sheldrick, *SHELXS-97 and SHELXL-97. Programs for solution and refinement of crystal structures from diffraction data*, University of Göttingen, Germany, 1997, *Acta Crystallogr.*, **A64**, 112 (2008).
4. L.J. Farrugia, *WinGX*, University of Glasgow, Scotland, 1998; *J. Appl. Cryst.*, **32**, 837 (1999).
5. L.J. Farrugia, *ORTEP-3 for Windows*, University of Glasgow, Scotland, 1997; *J. Appl. Cryst.*, **30**, 565 (1997).
6. A.L. Spek, *Acta Crystallogr.*, **D65**, 148 (2009).
